# Supplementary figures and images for: SWAN: Subset-quantile Within Array Normalization for Illumina Infinium HumanMethylation450 BeadChips
Source: Springer Nature journal article supplement (doi:10.1186/gb-2012-13-6-r44), 2012-06-15

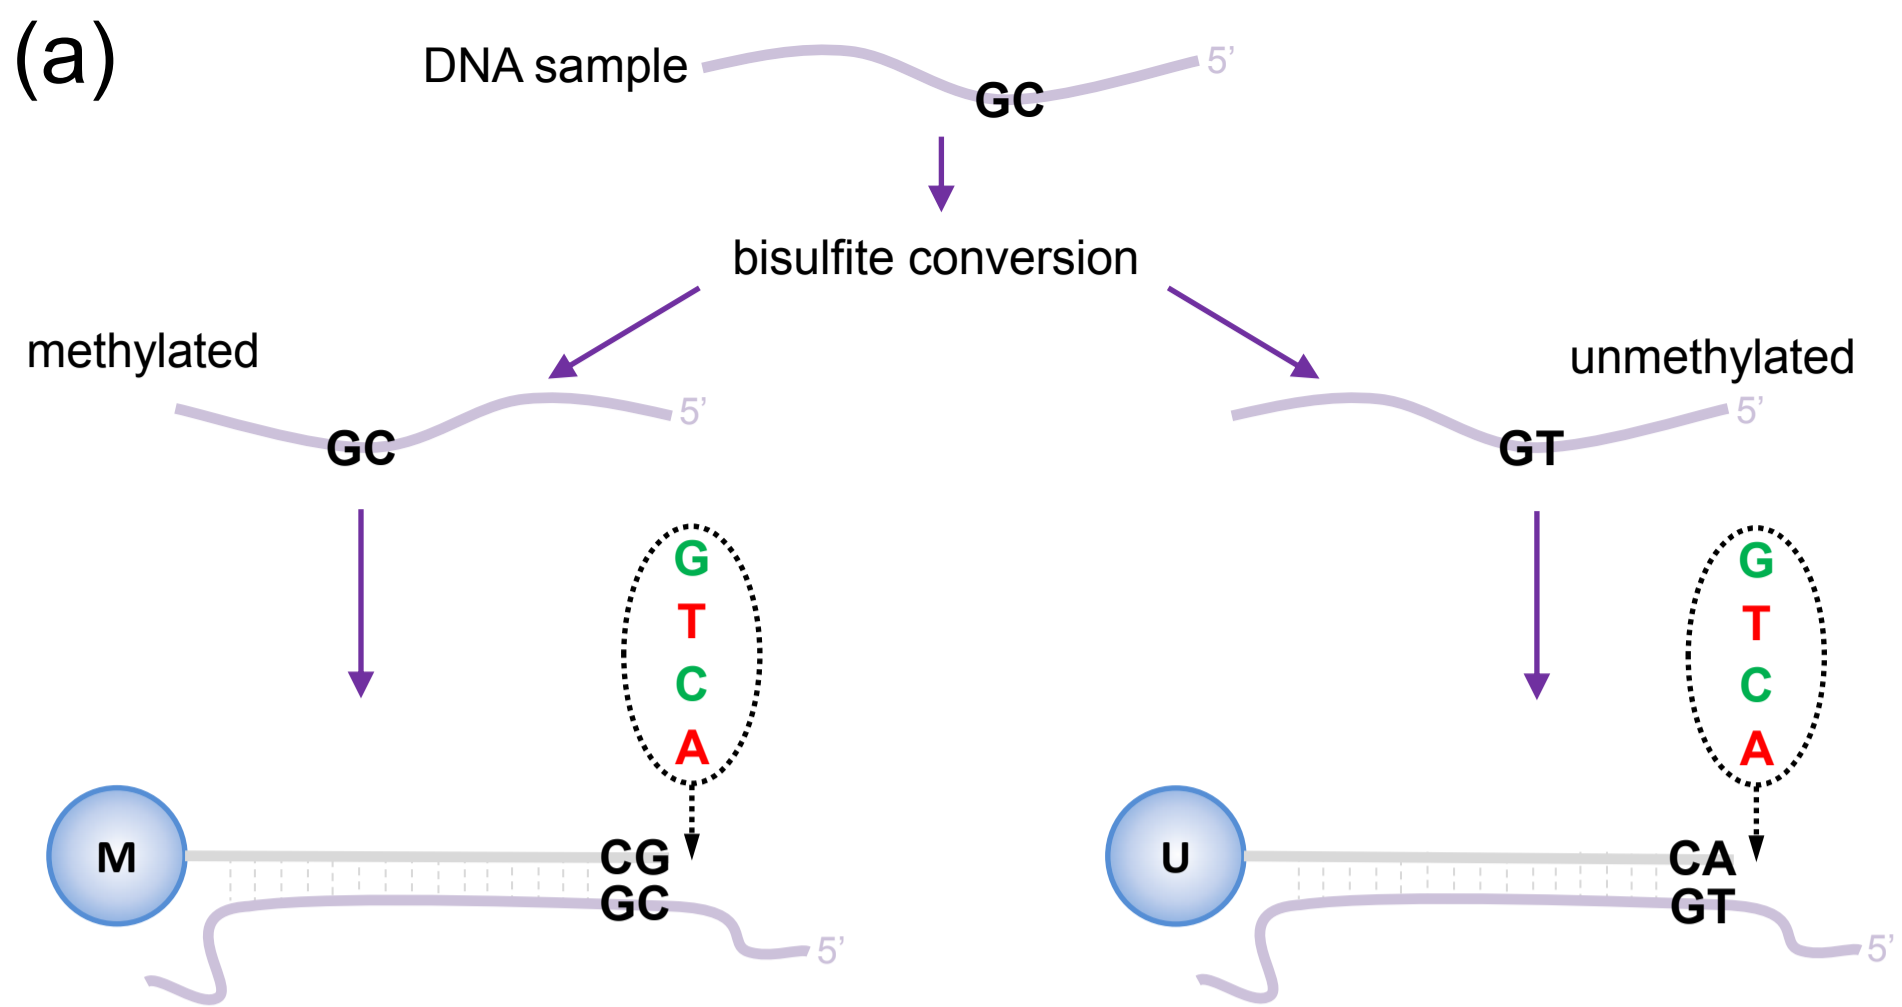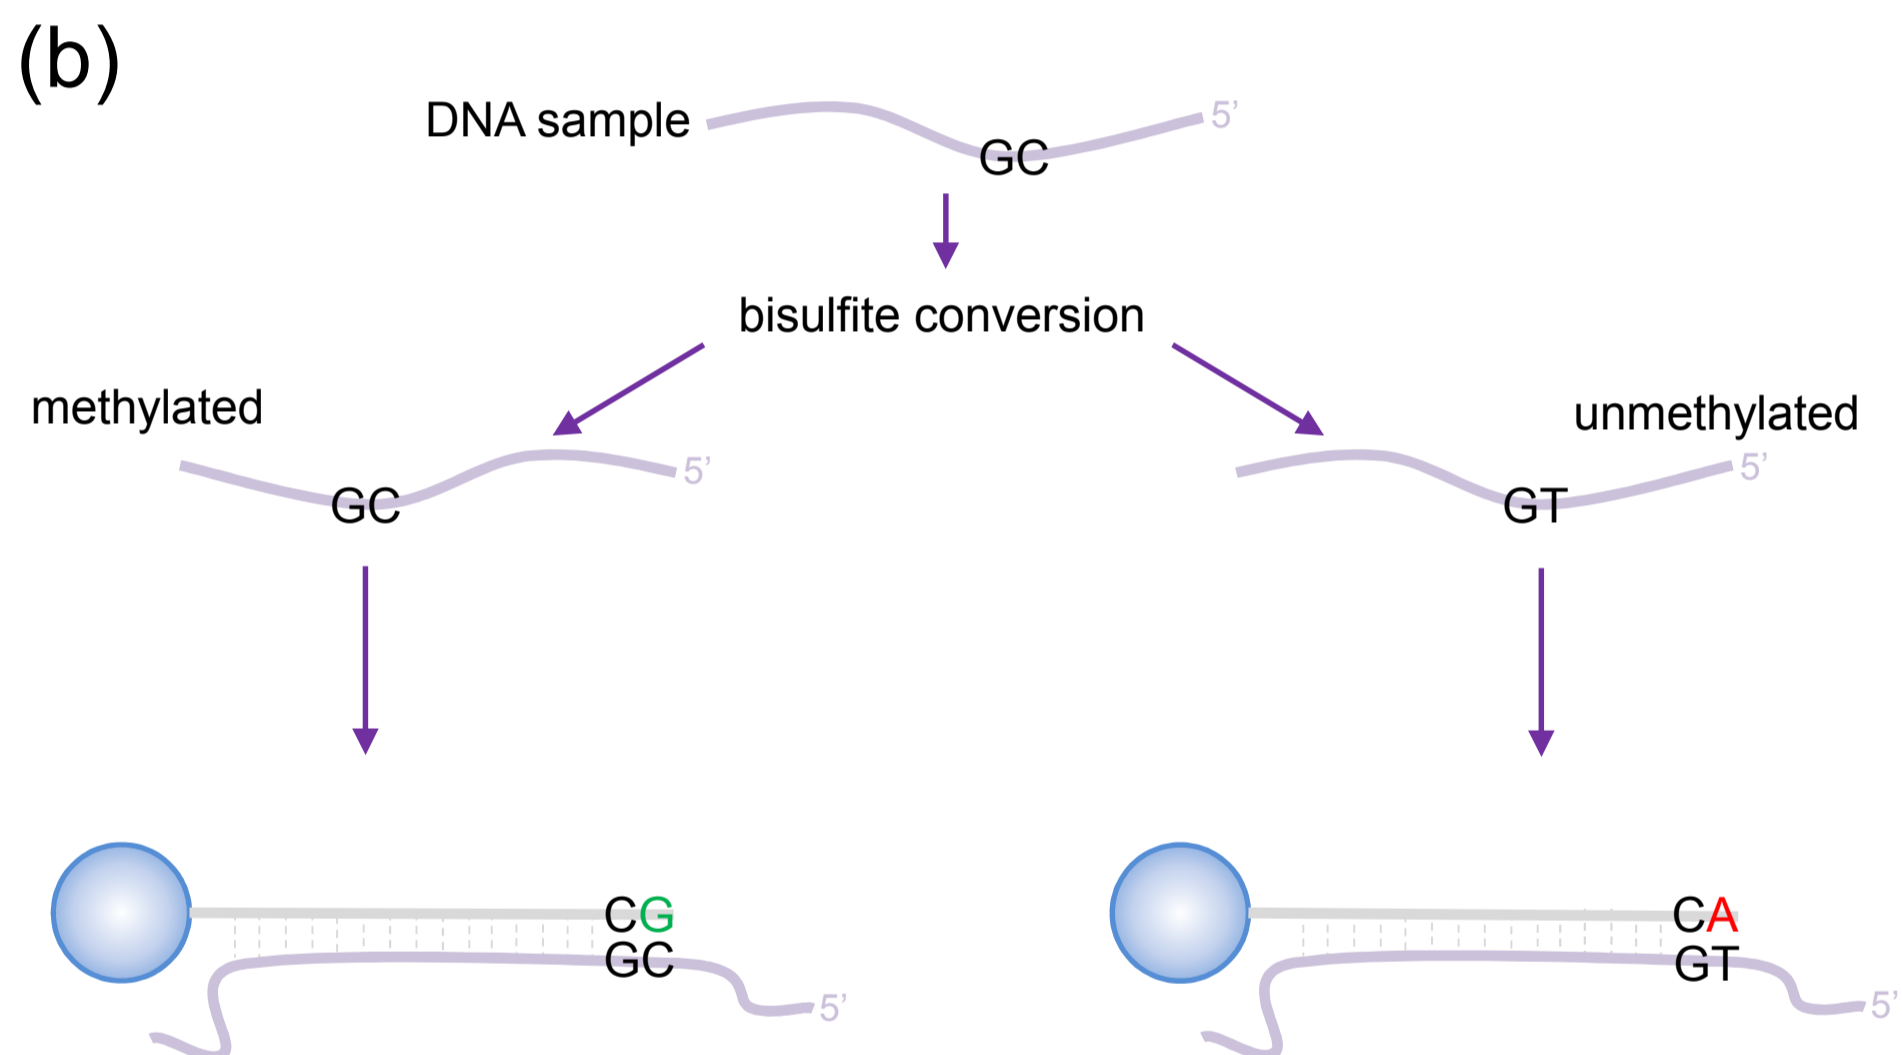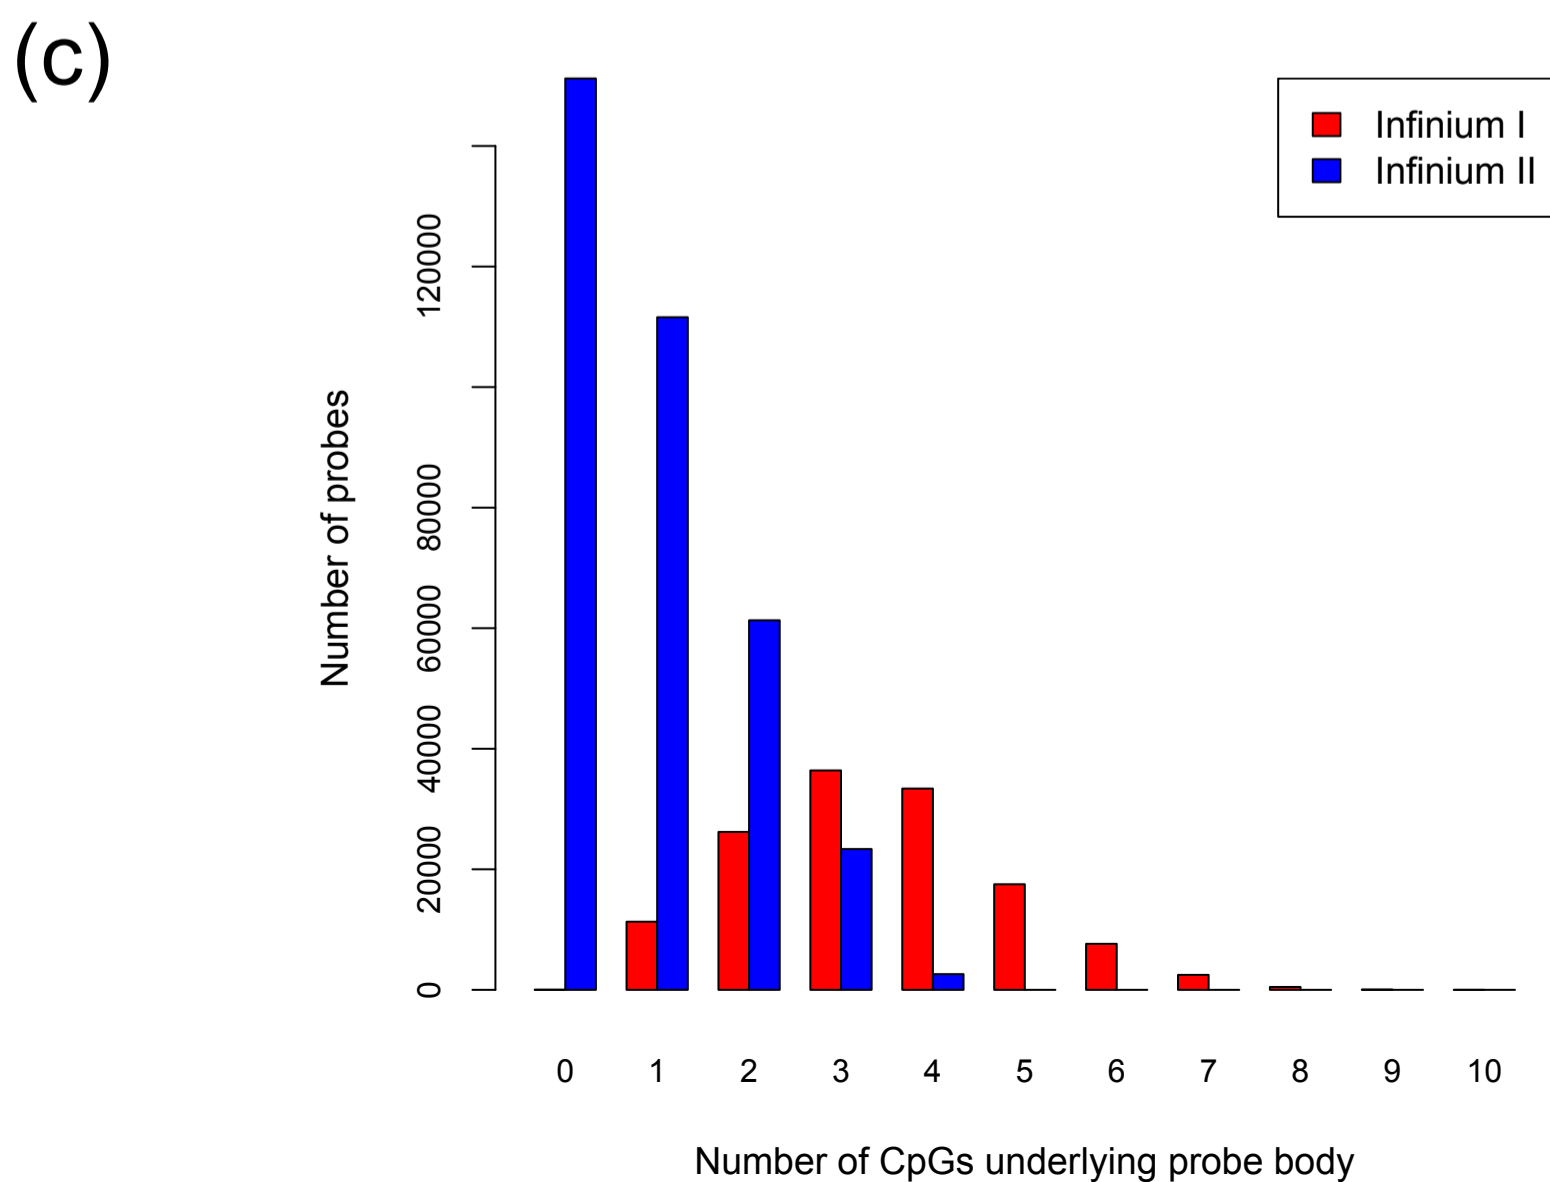

Supplement: 13059_2012_2883_MOESM3_ESM.pdf [file 13059_2012_2883_MOESM3_ESM.pdf]

### Methylated Channel

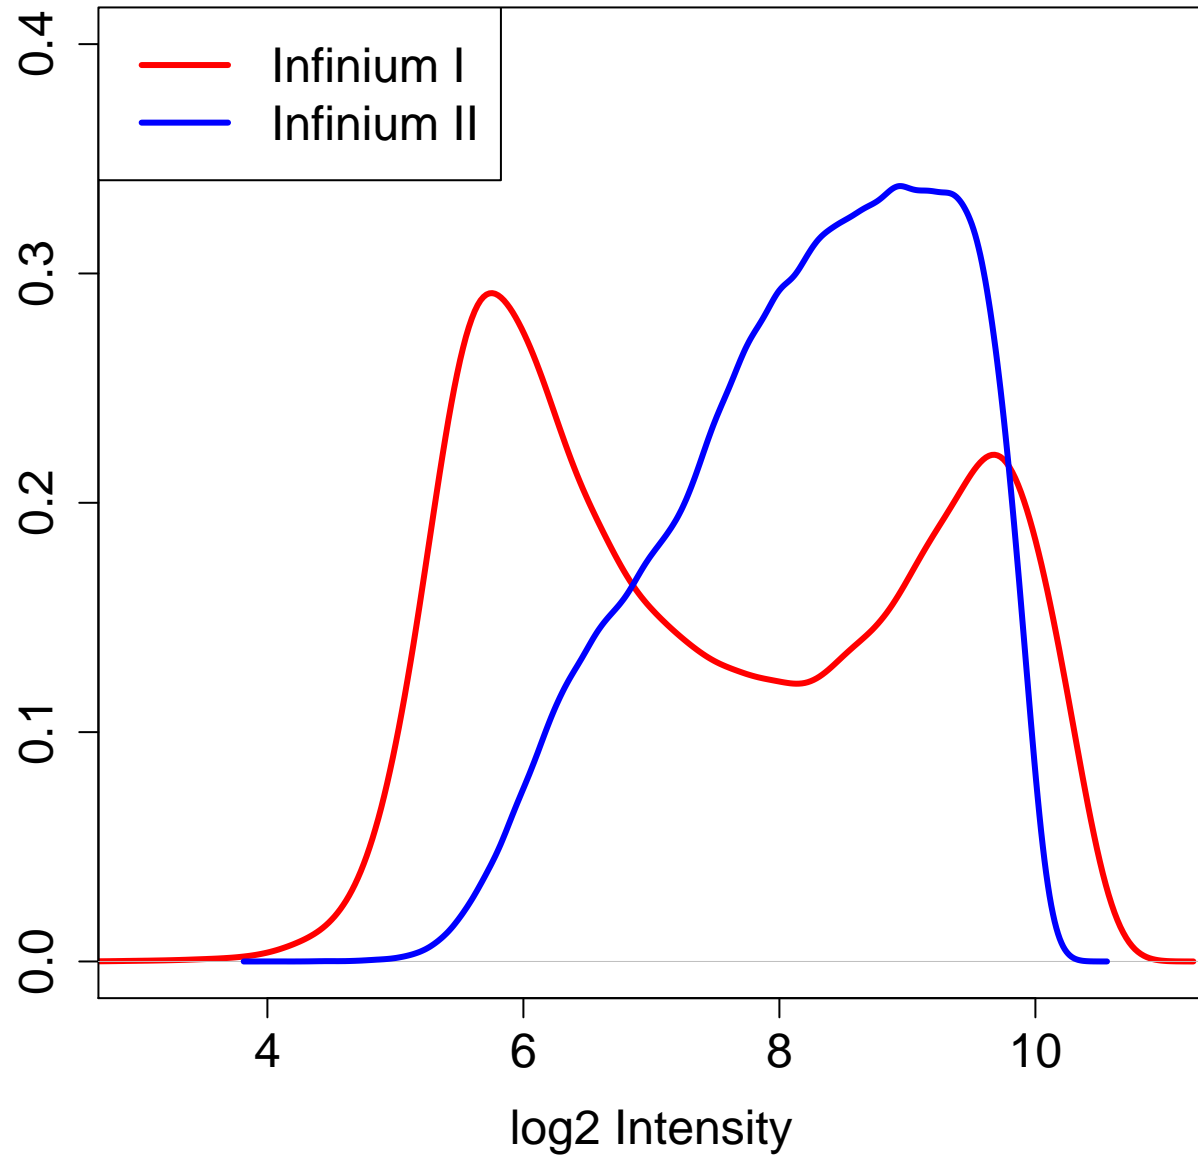

### Unmethylated Channel

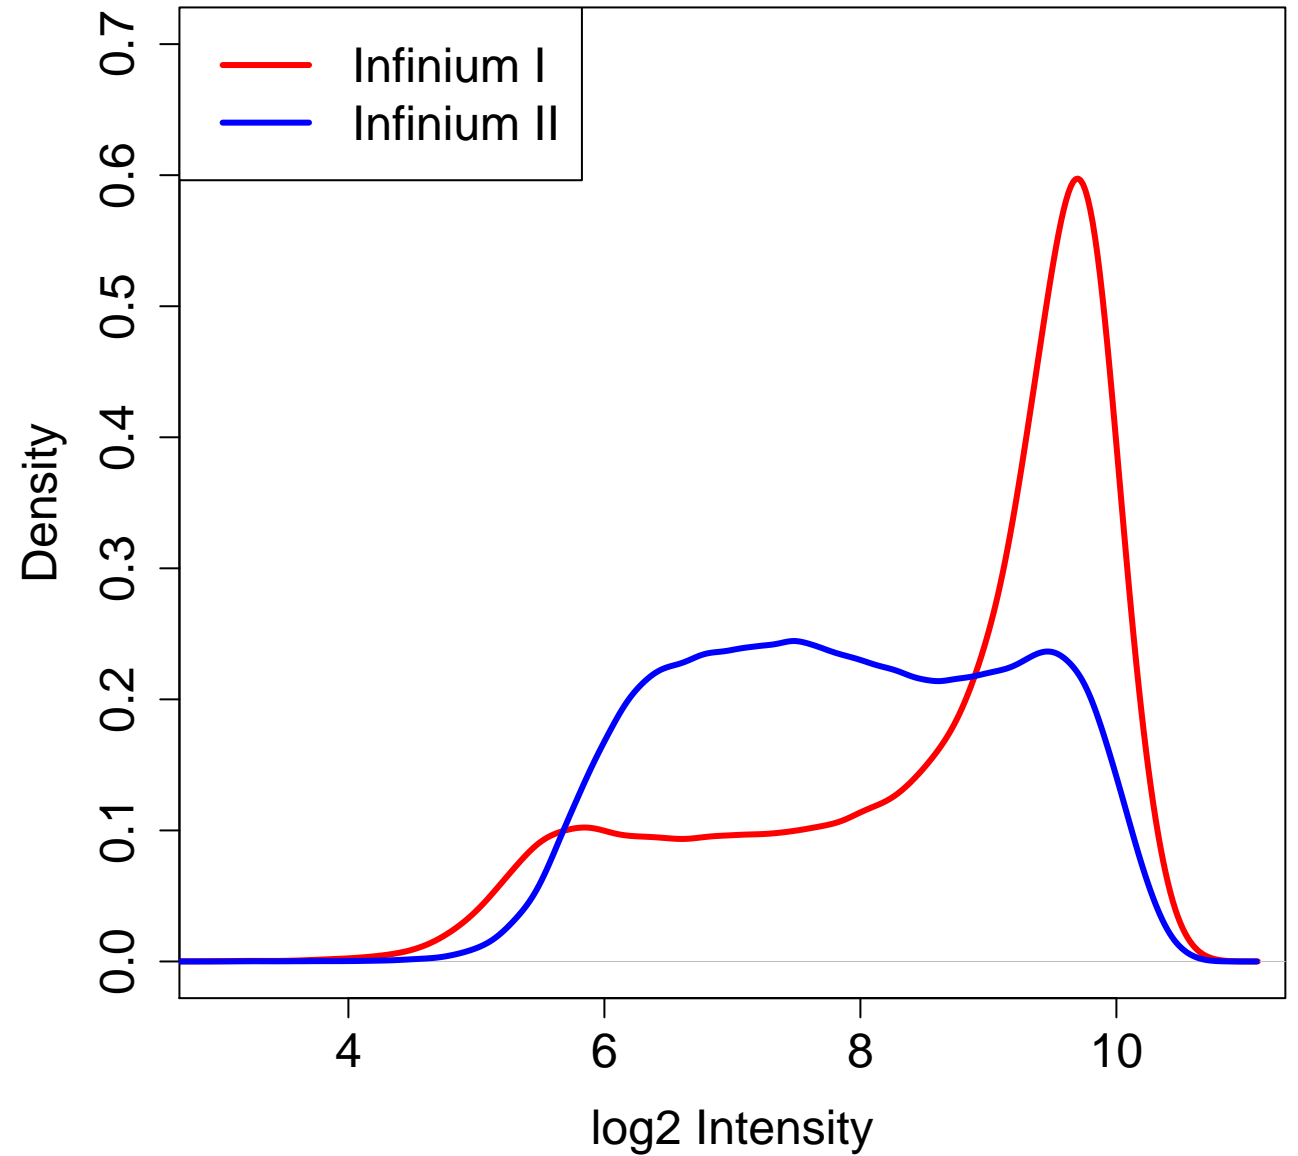

Supplement: 13059_2012_2883_MOESM4_ESM.pdf [file 13059_2012_2883_MOESM4_ESM.pdf]

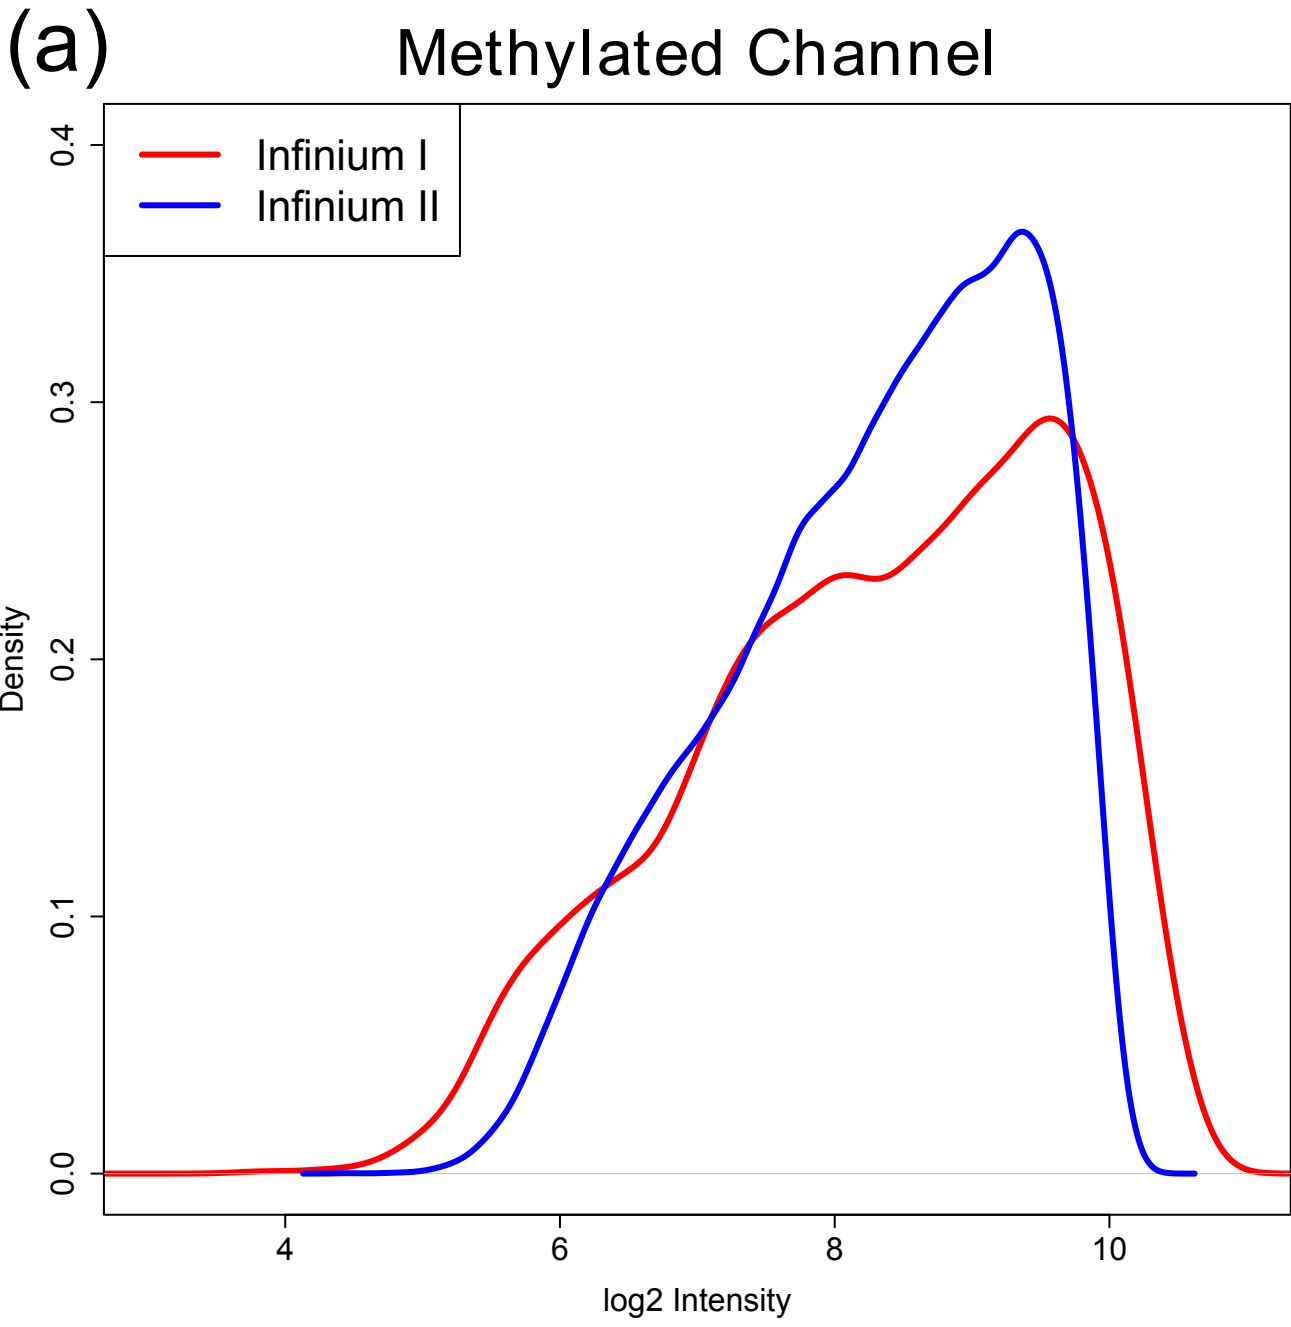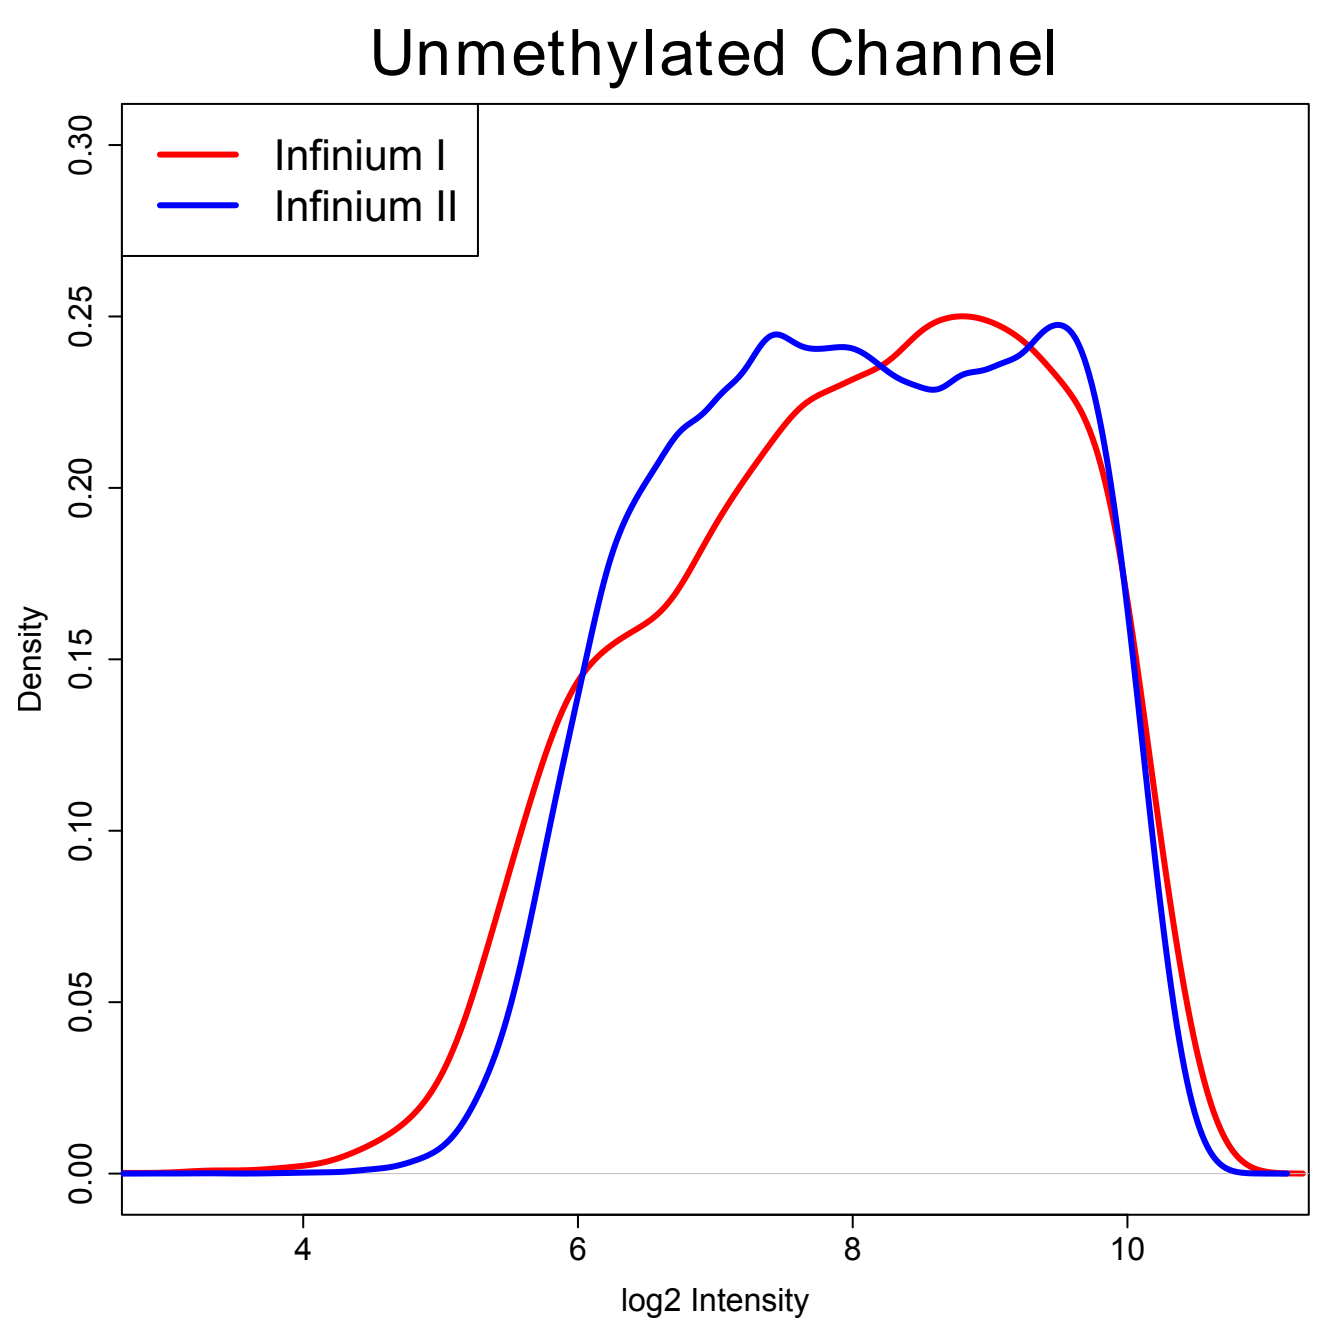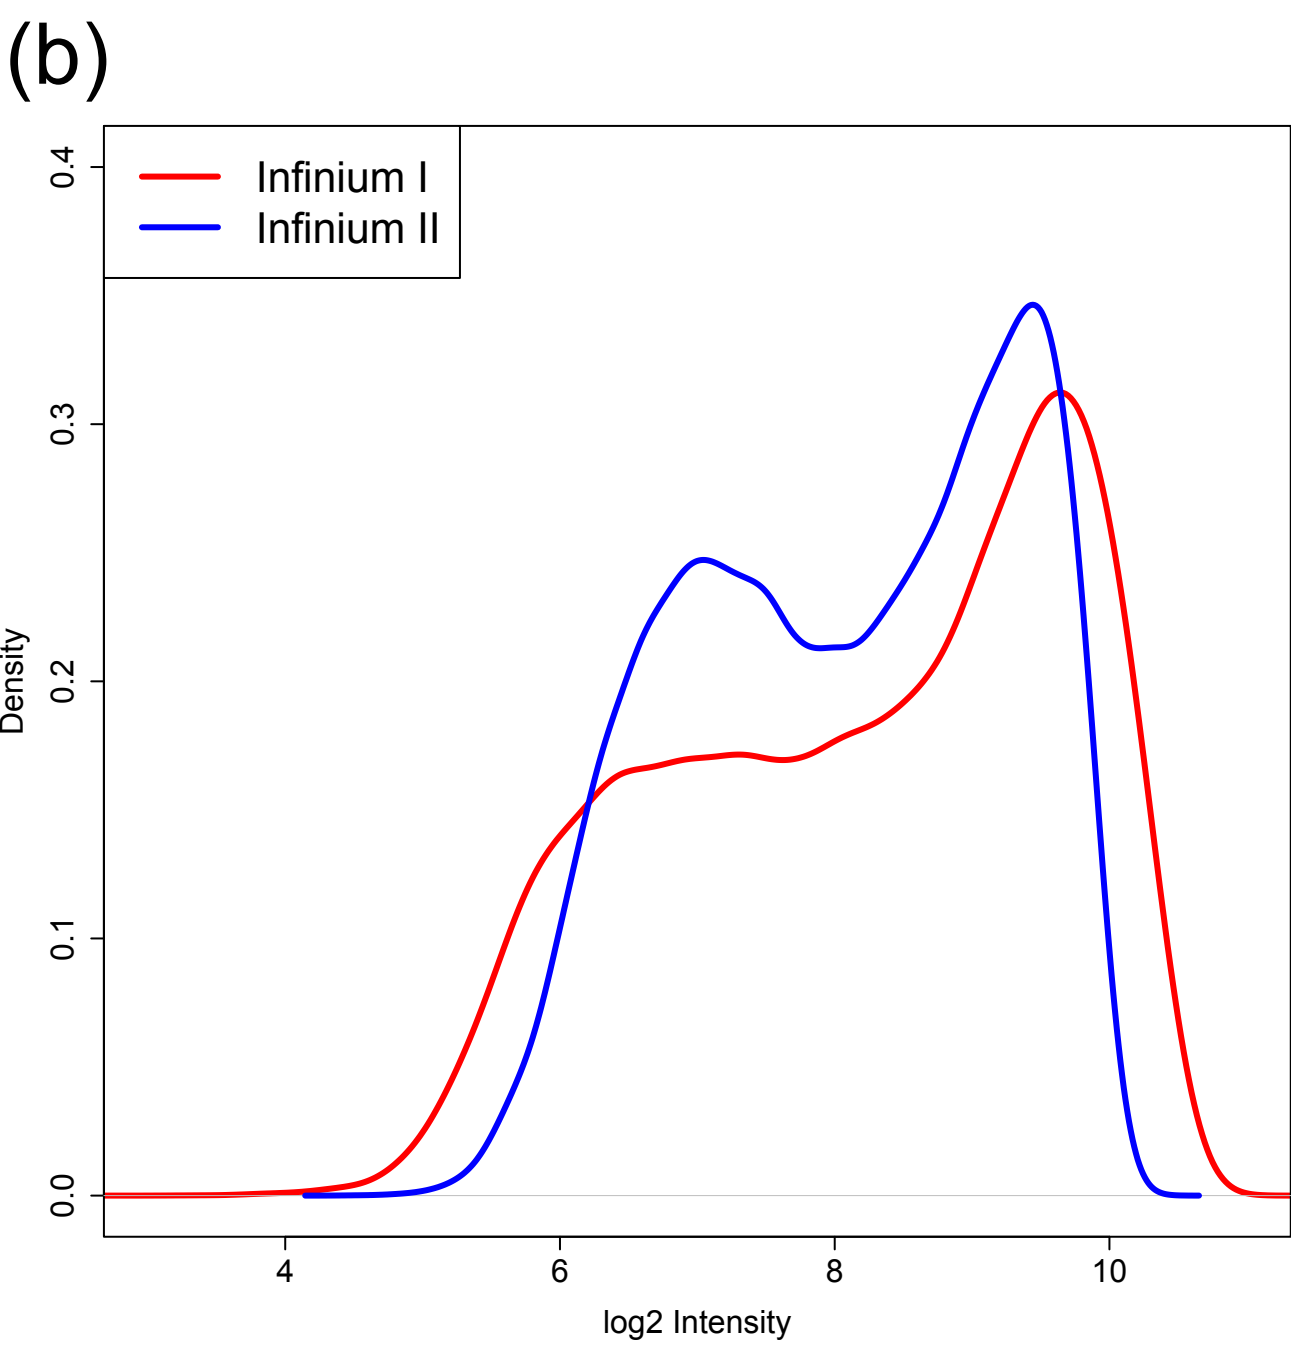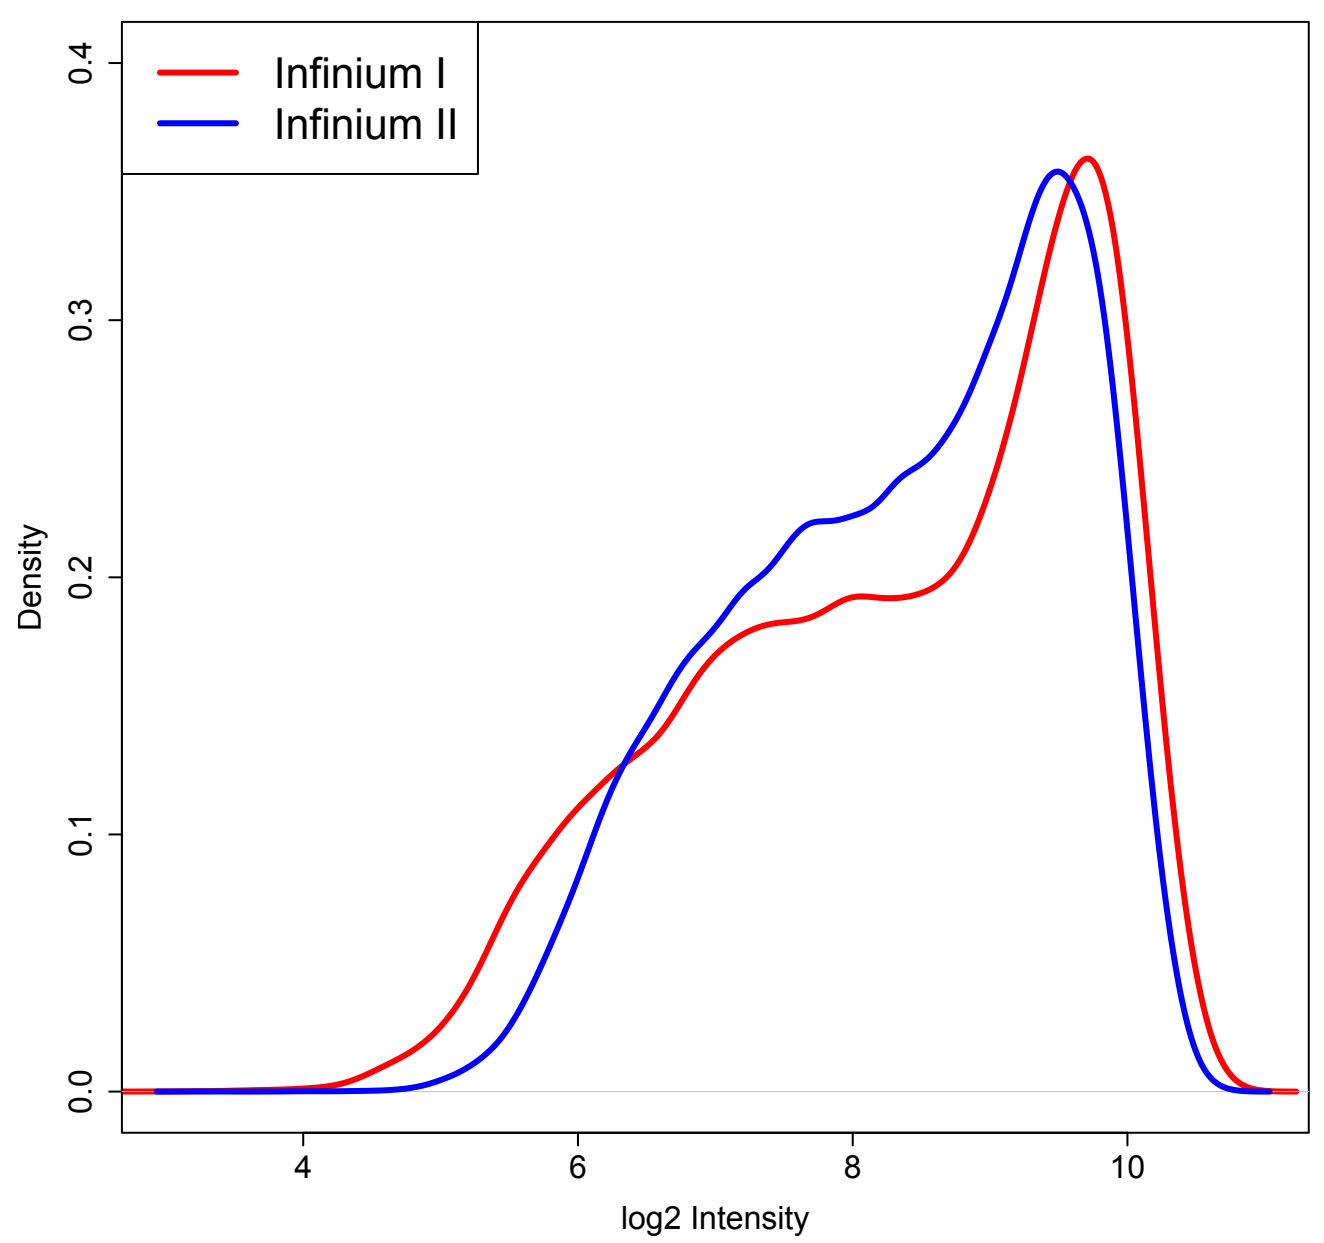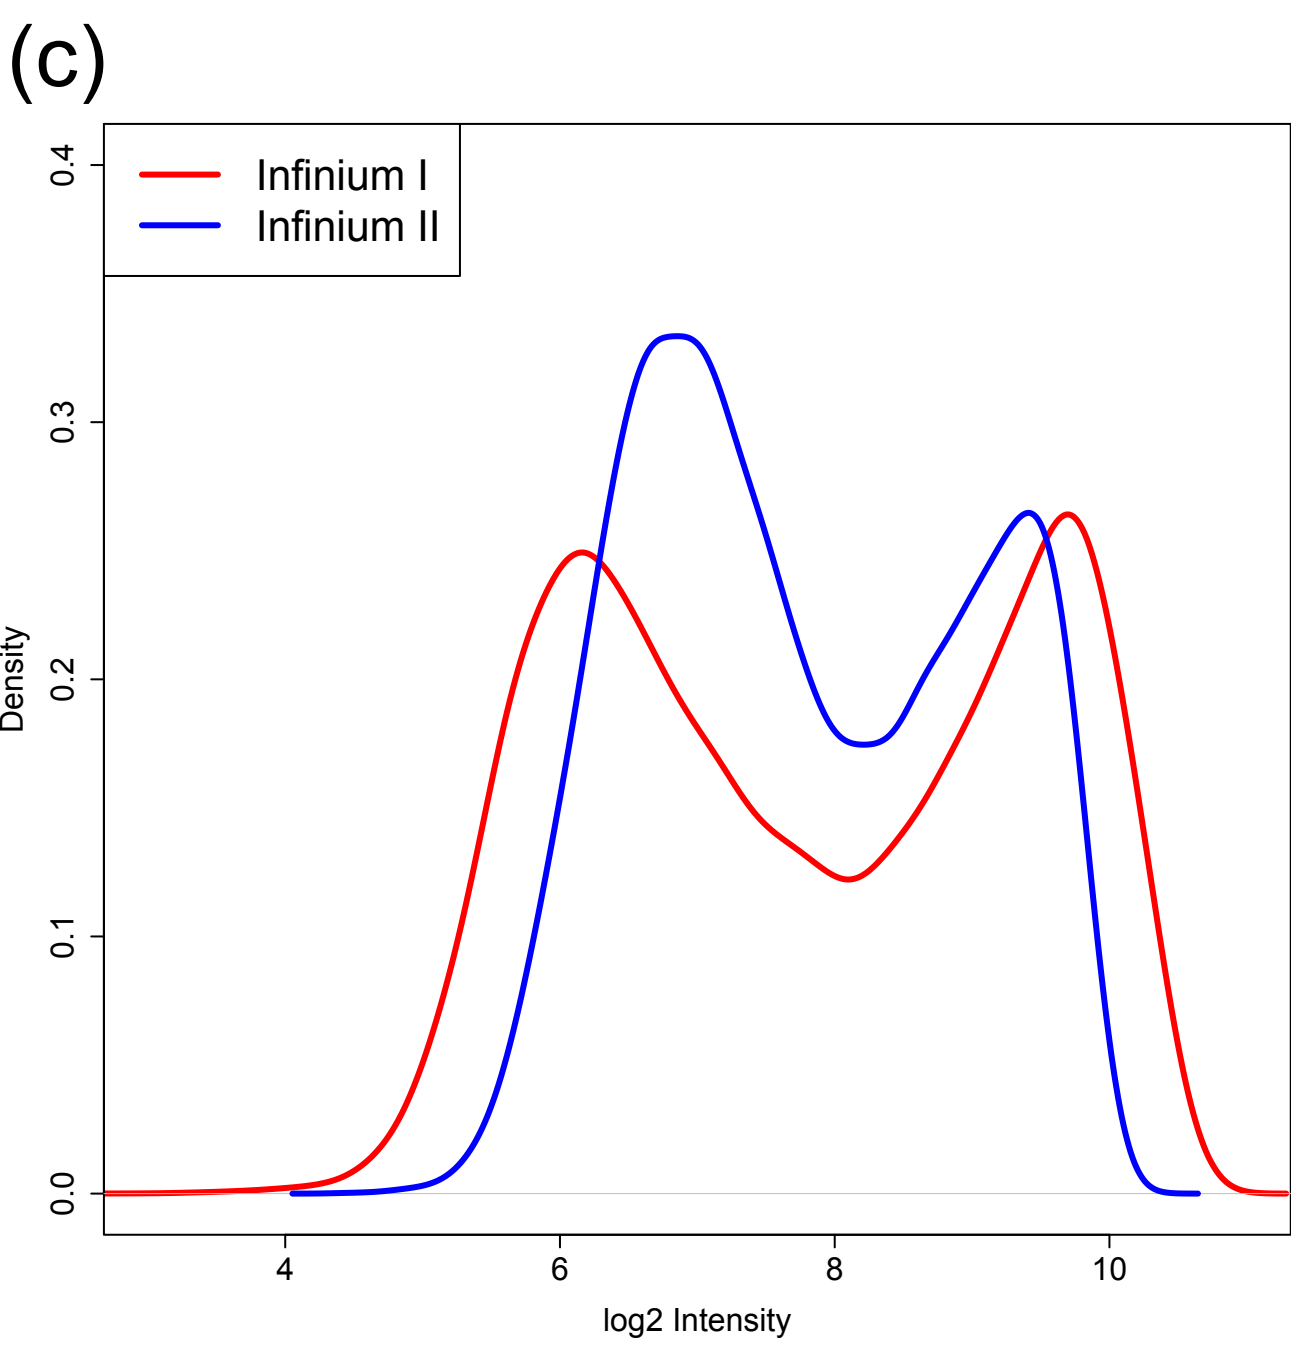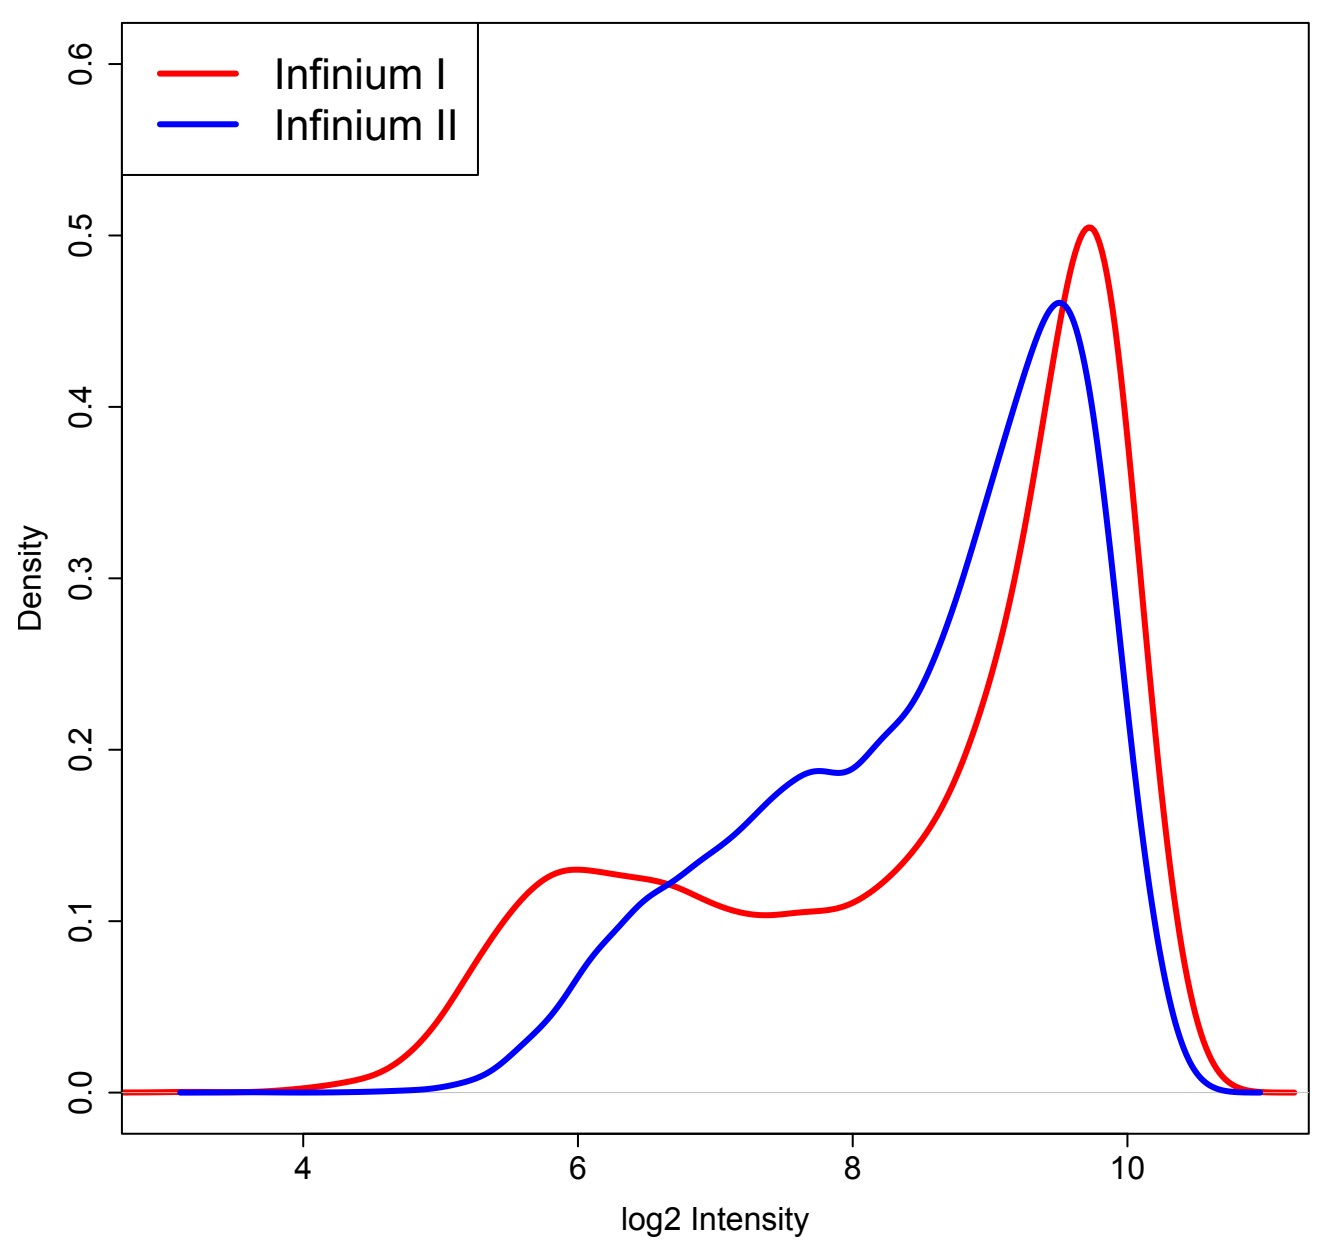

Supplement: 13059_2012_2883_MOESM5_ESM.pdf [file 13059_2012_2883_MOESM5_ESM.pdf]

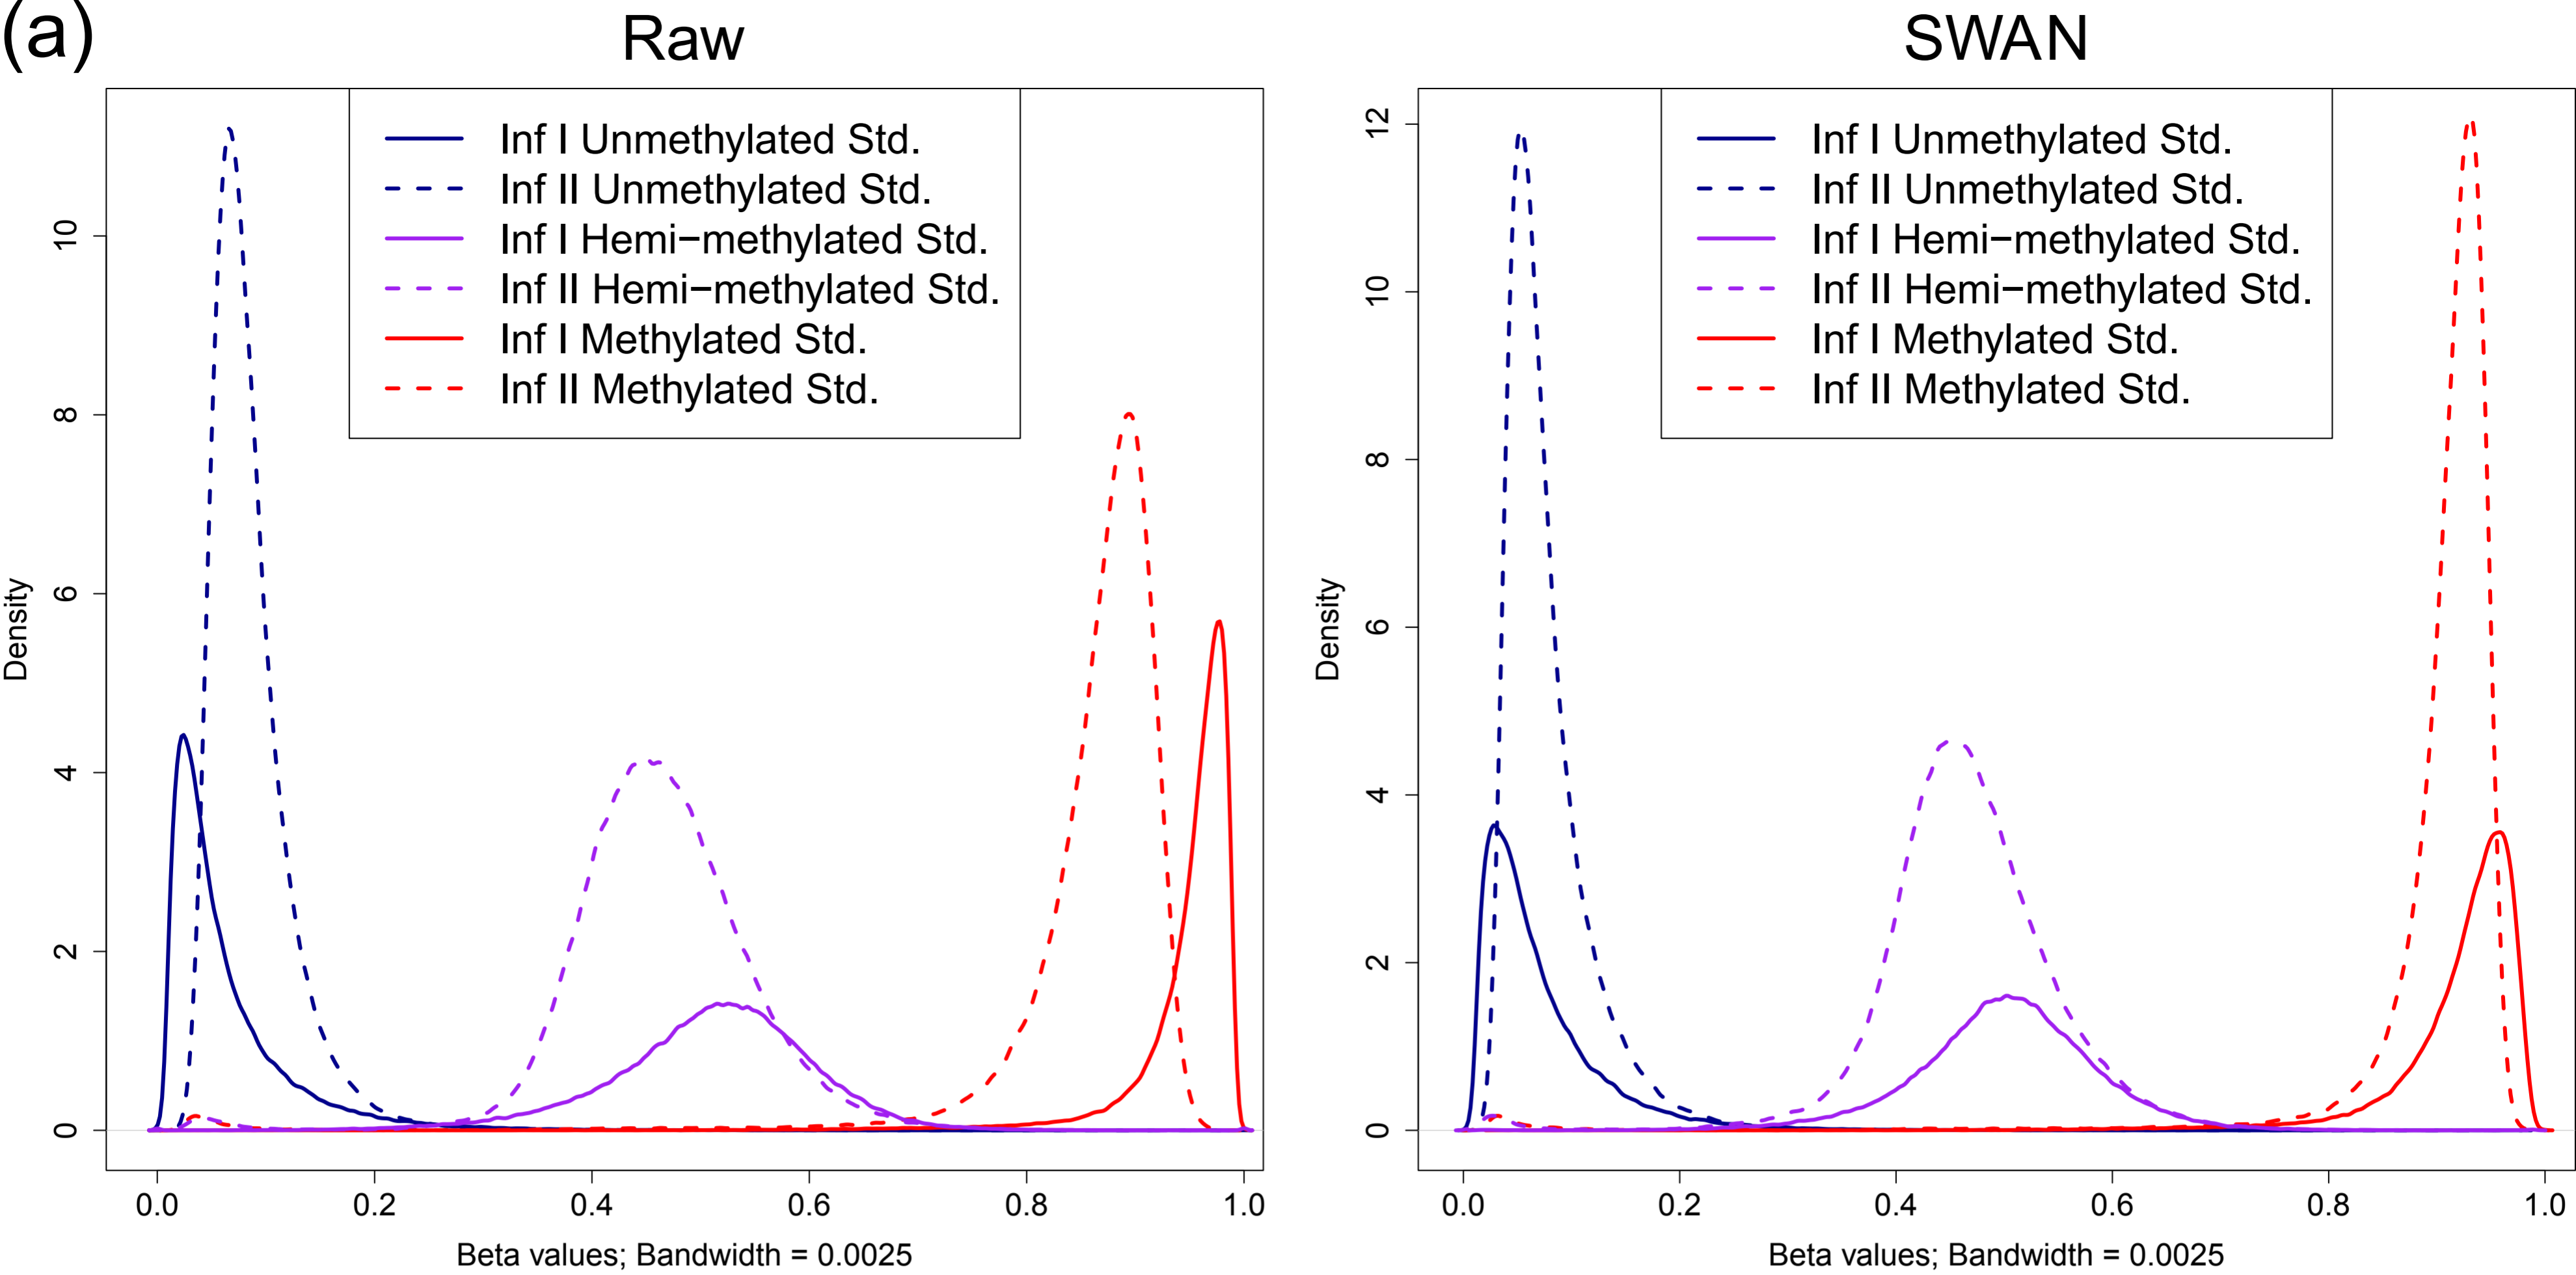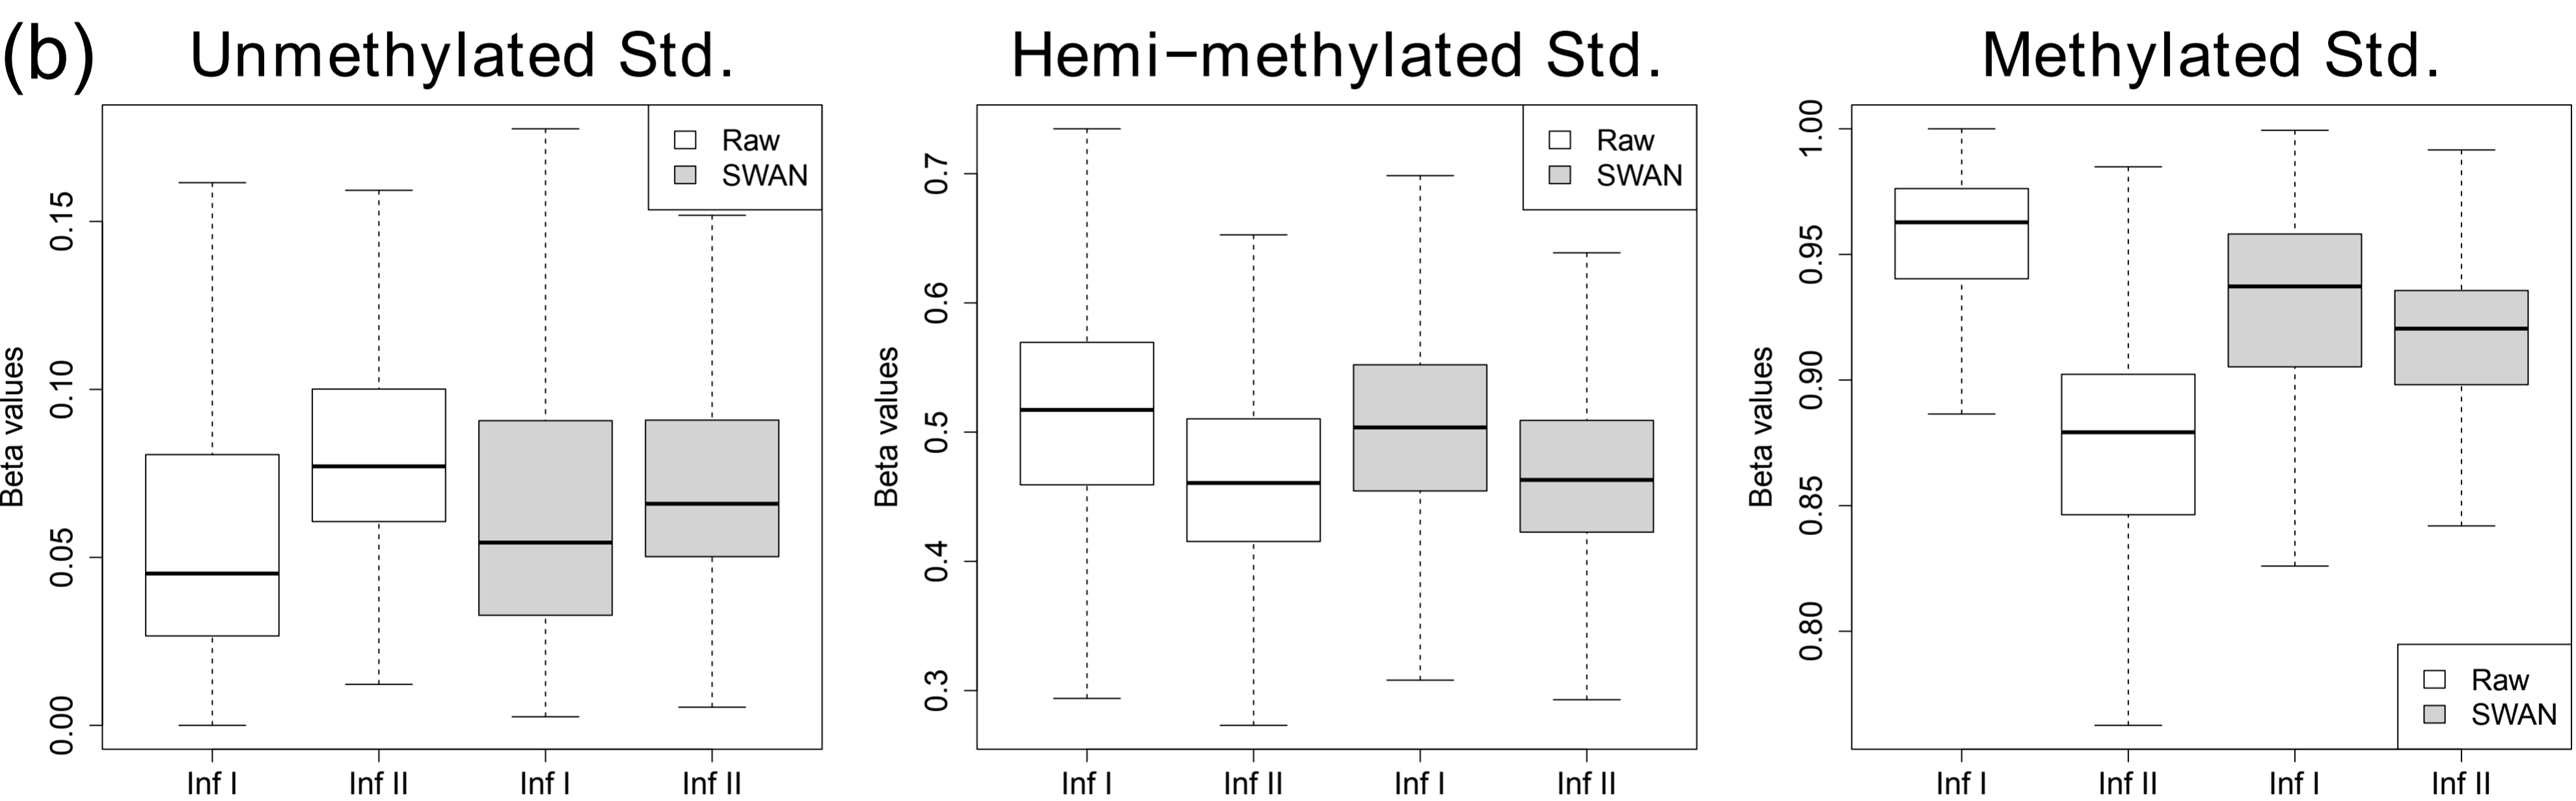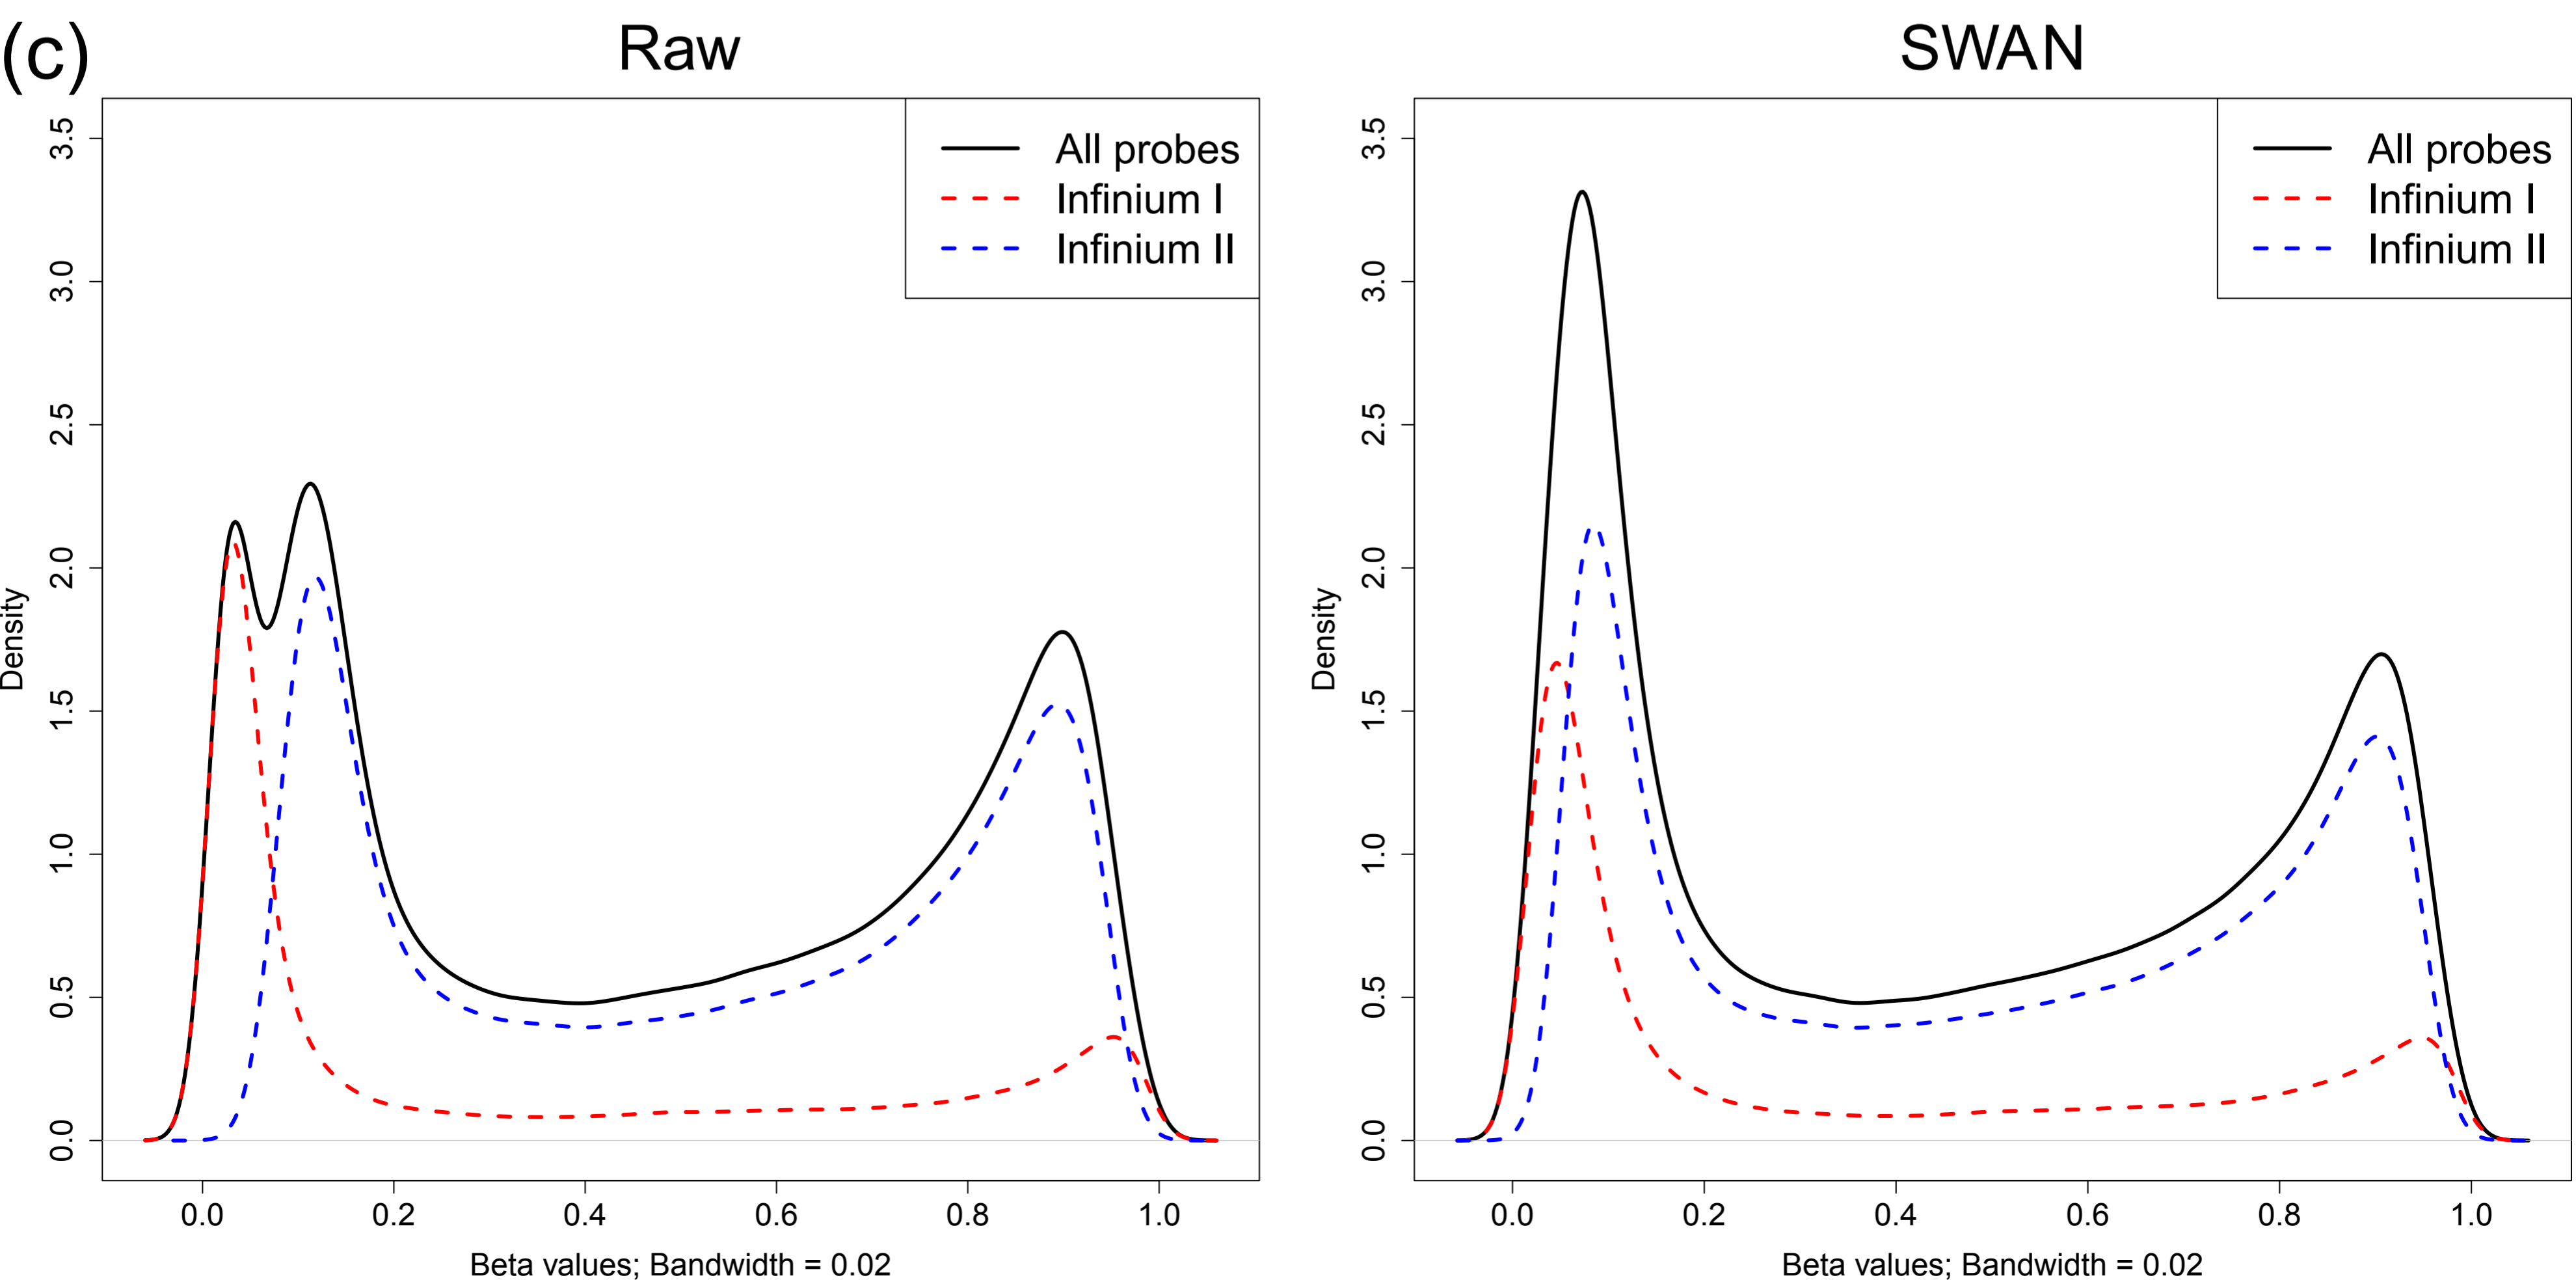

Supplement: 13059_2012_2883_MOESM6_ESM.pdf [file 13059_2012_2883_MOESM6_ESM.pdf]

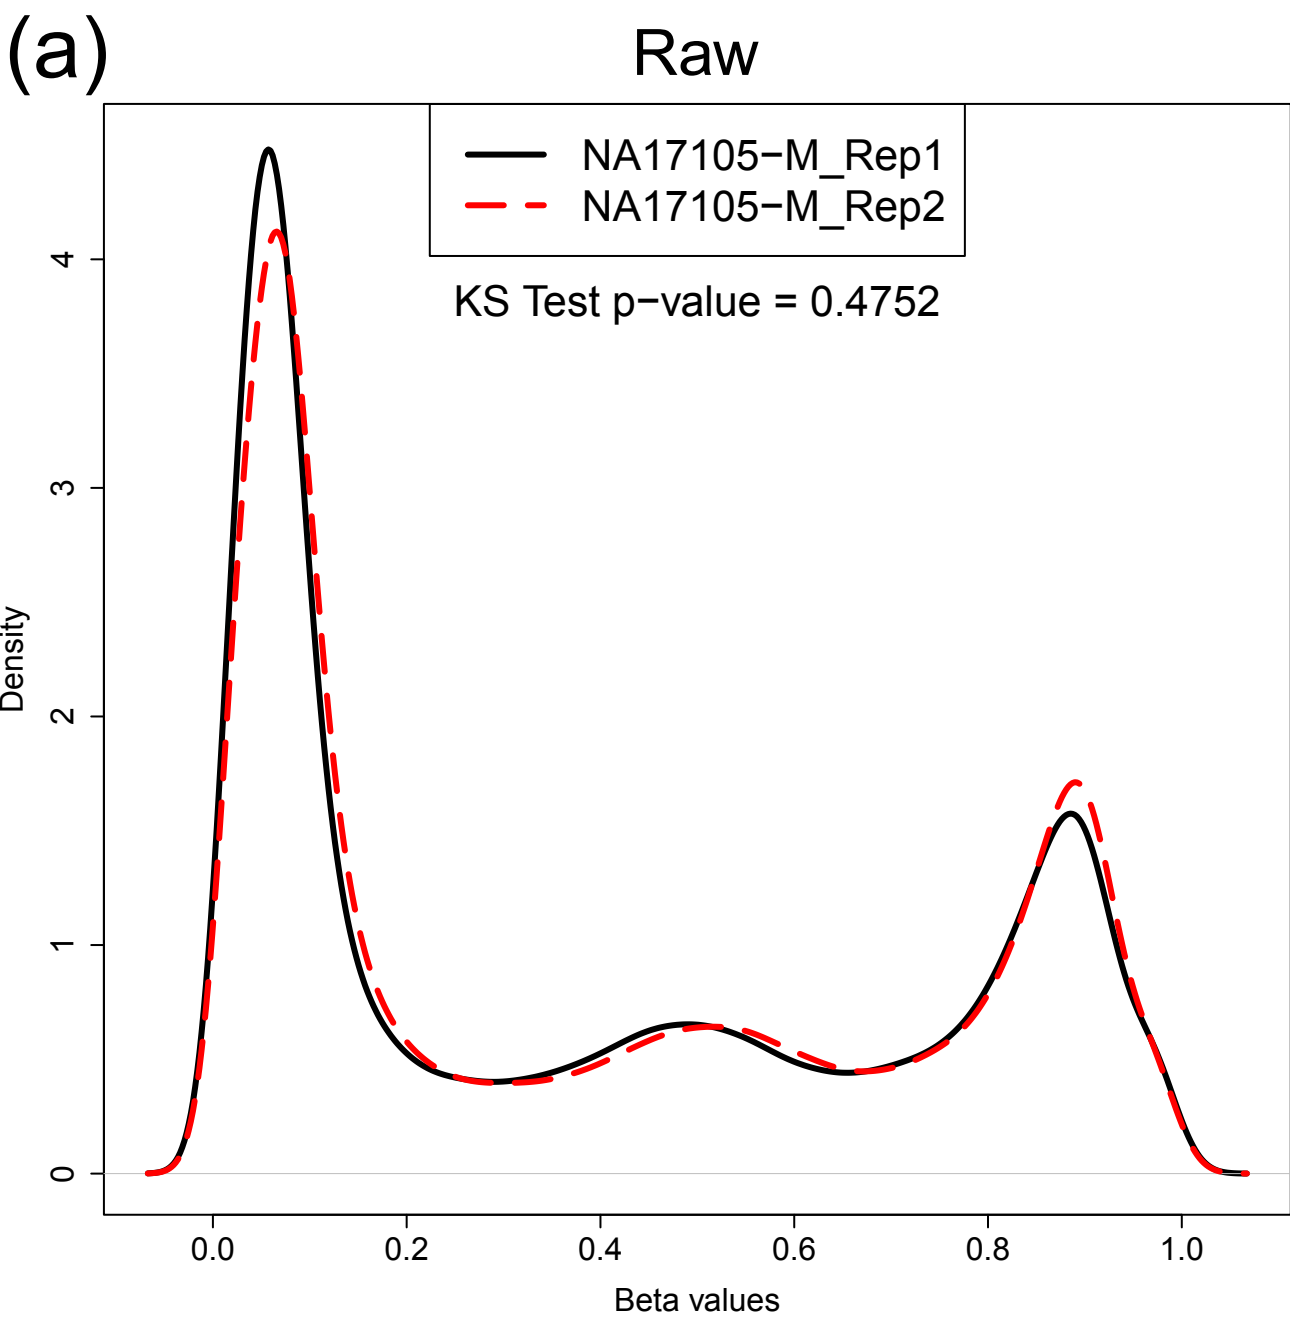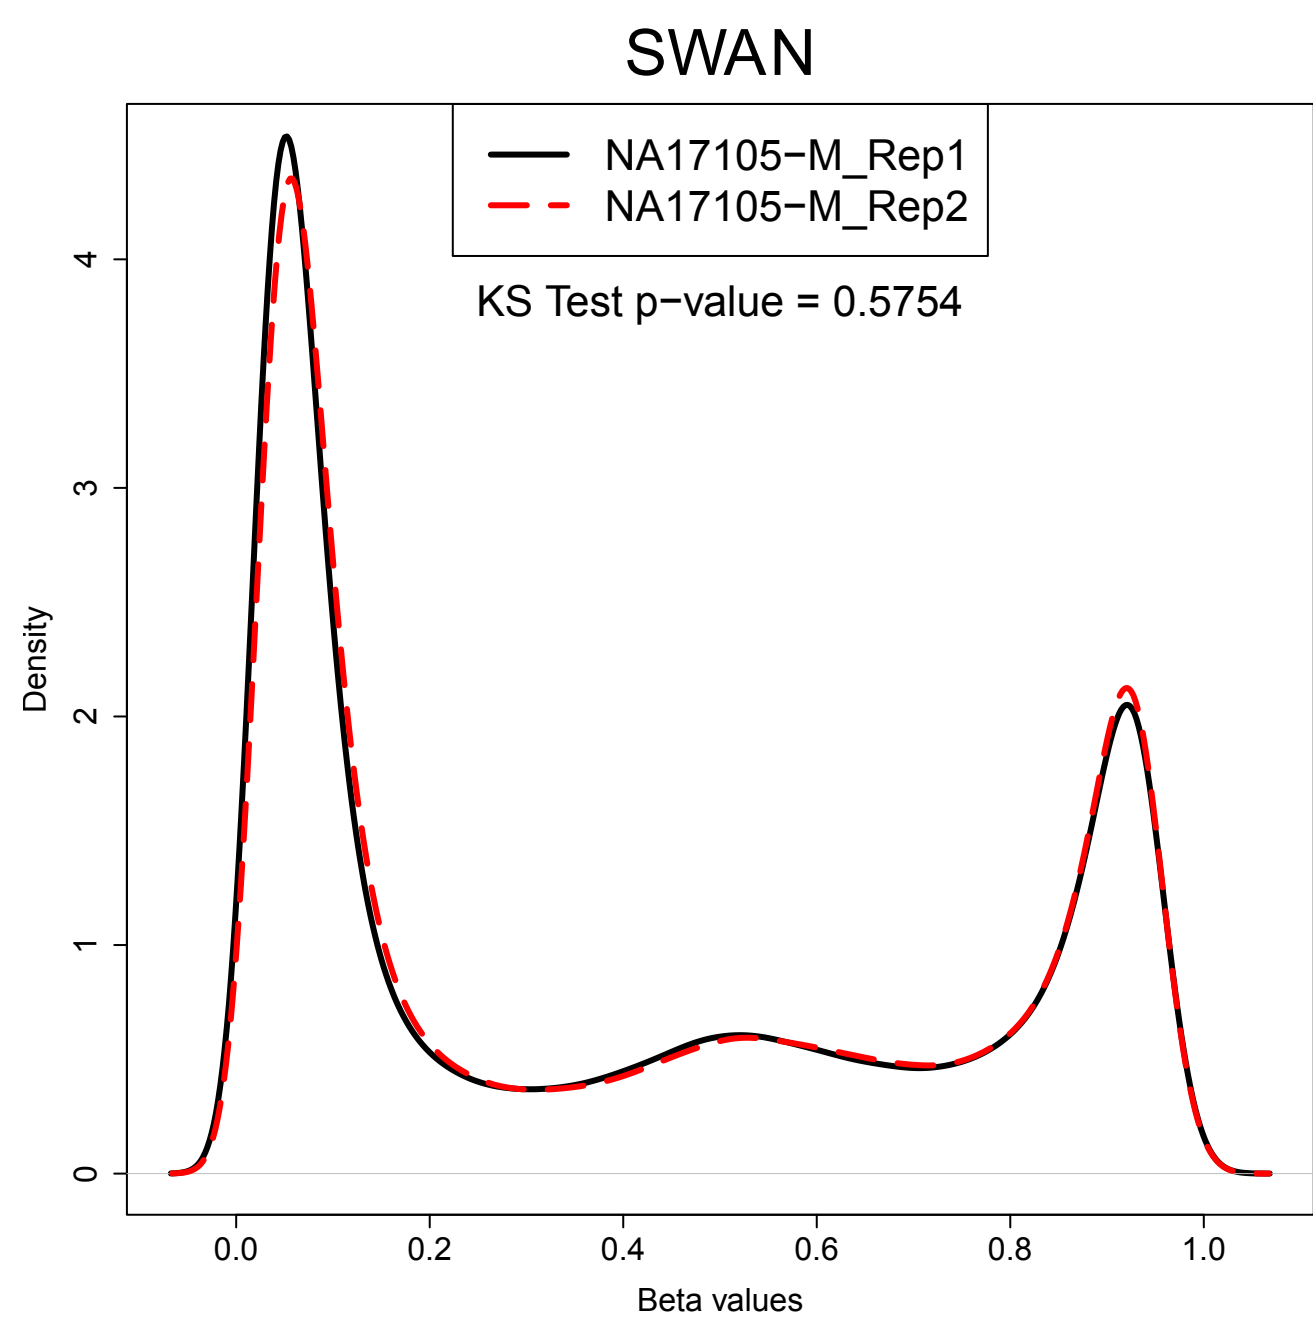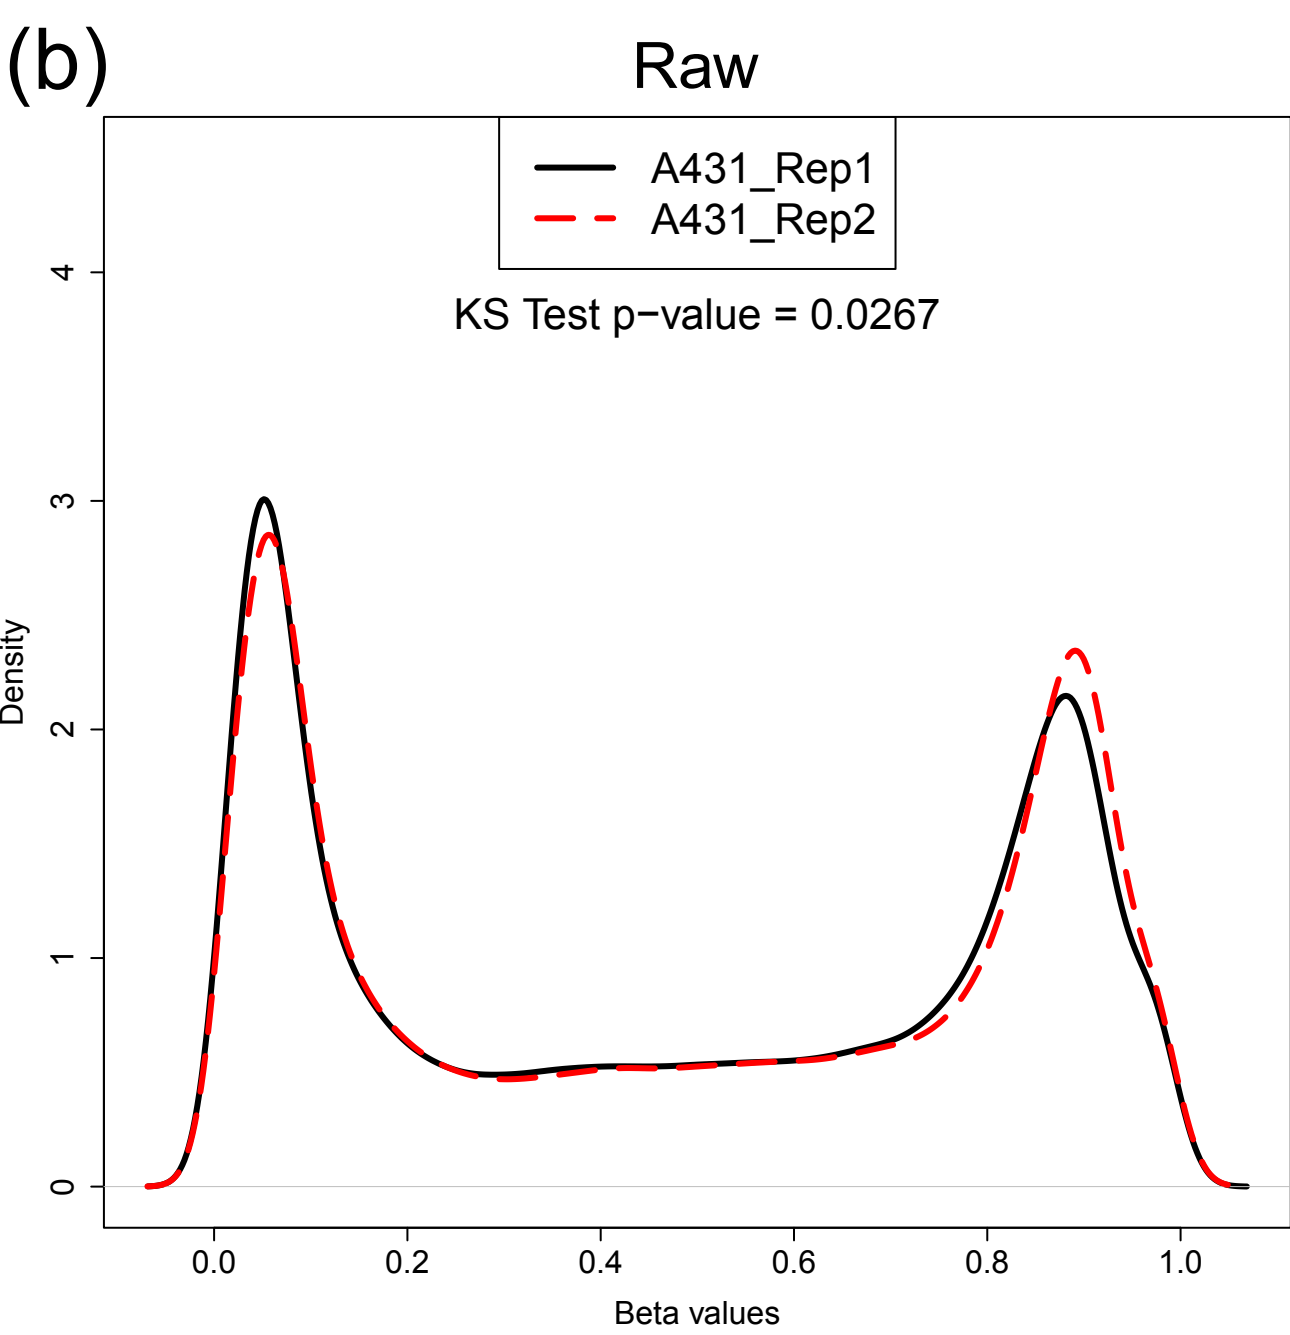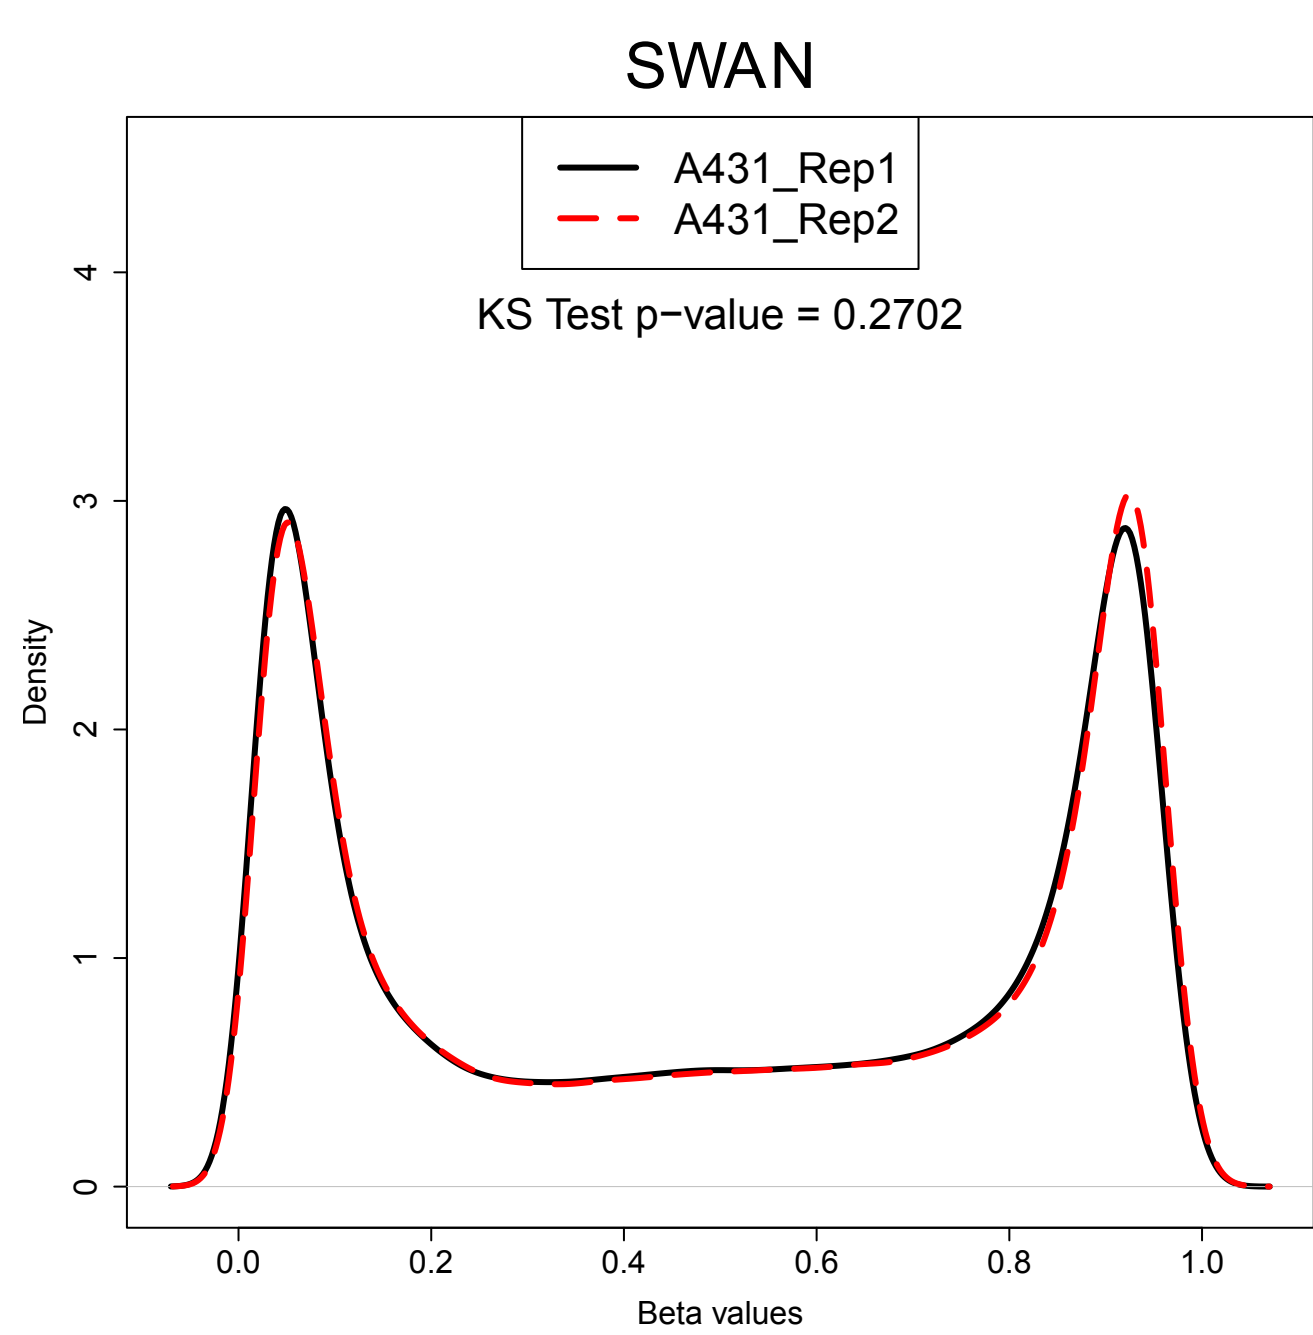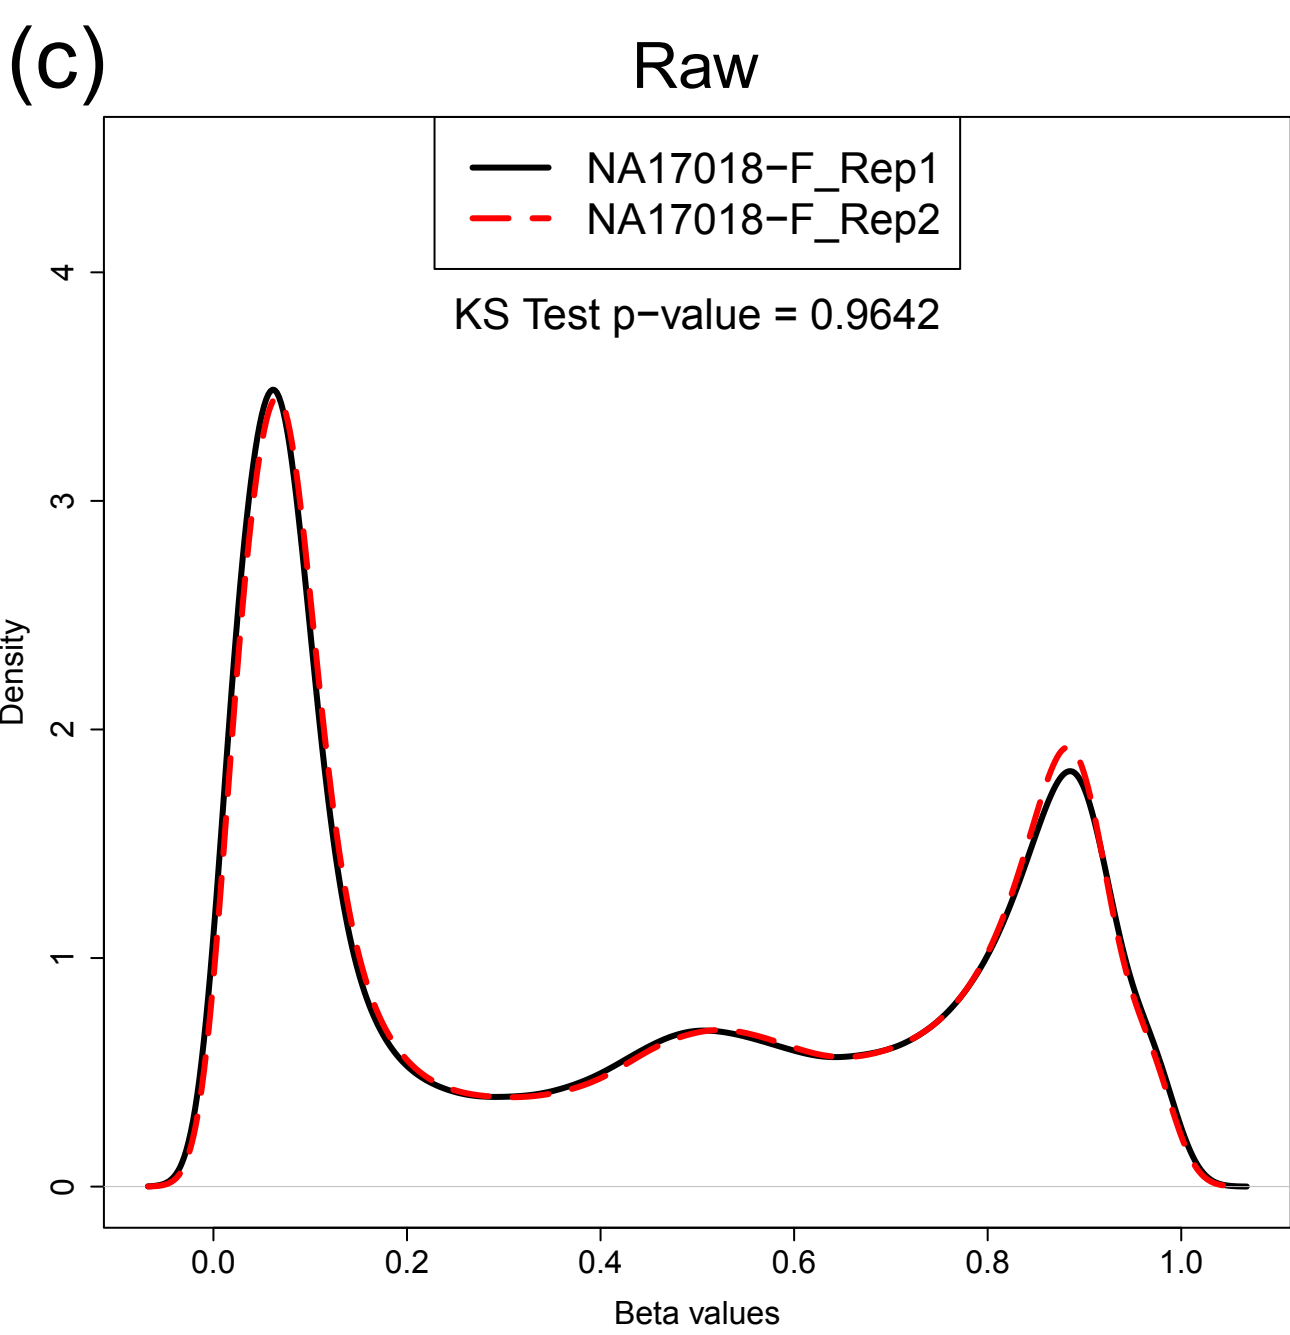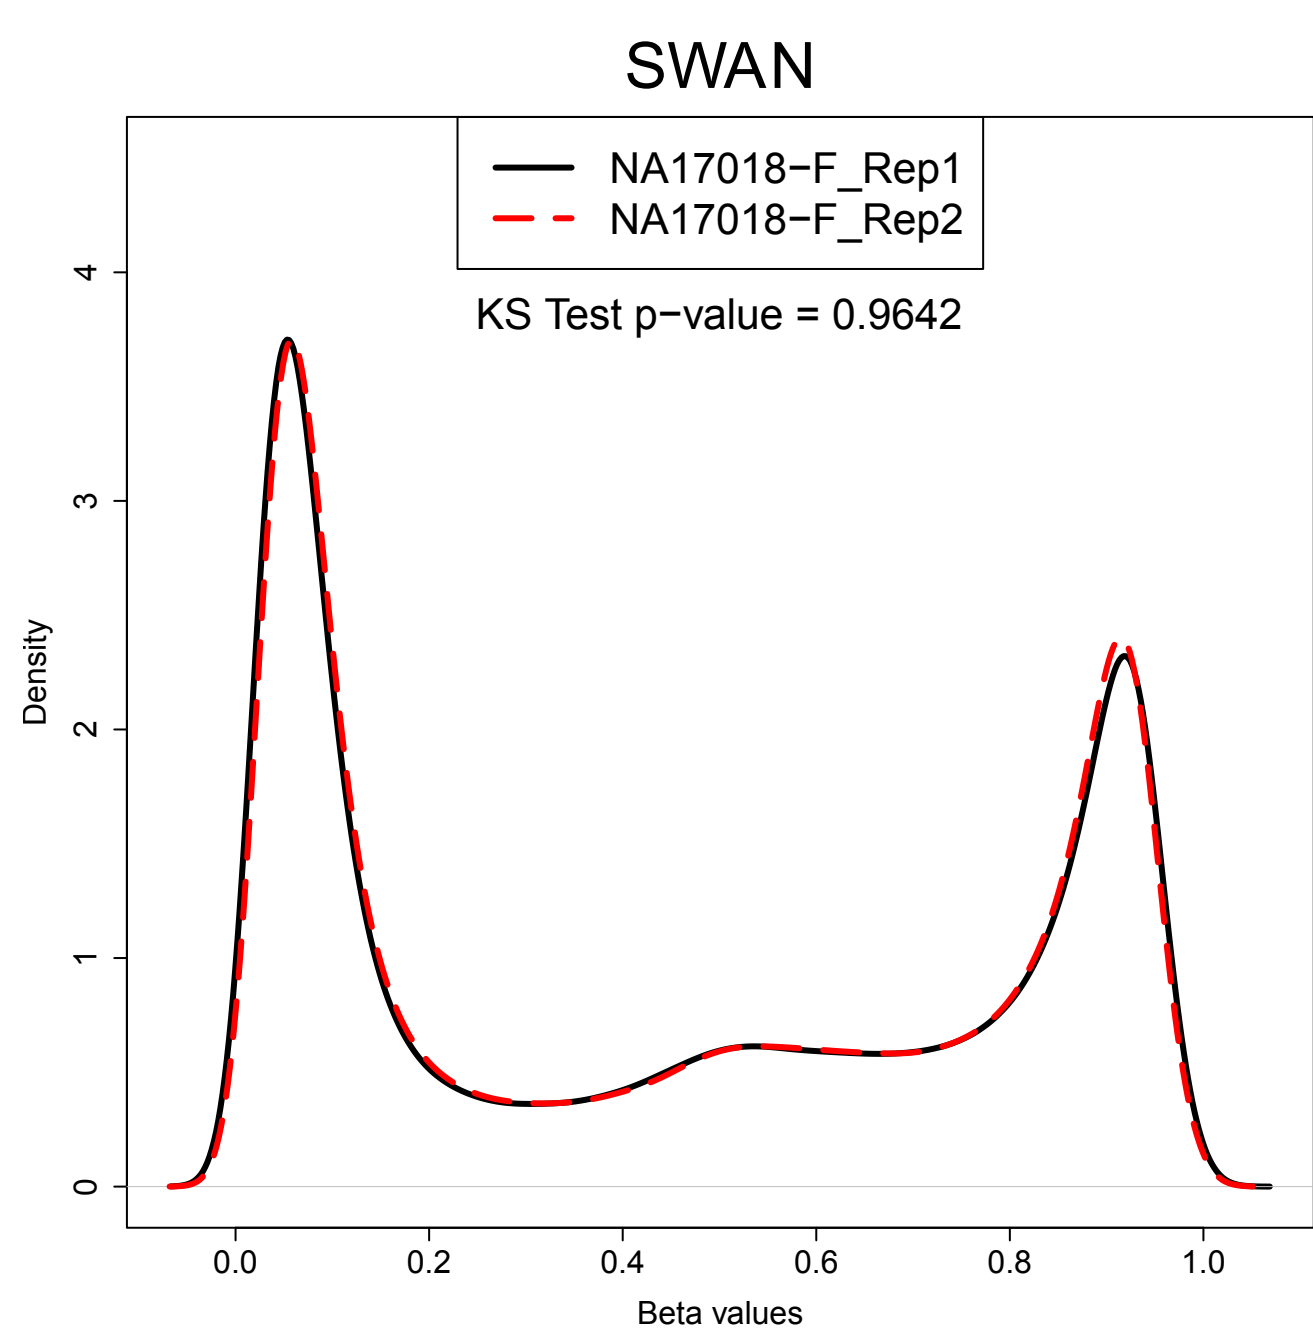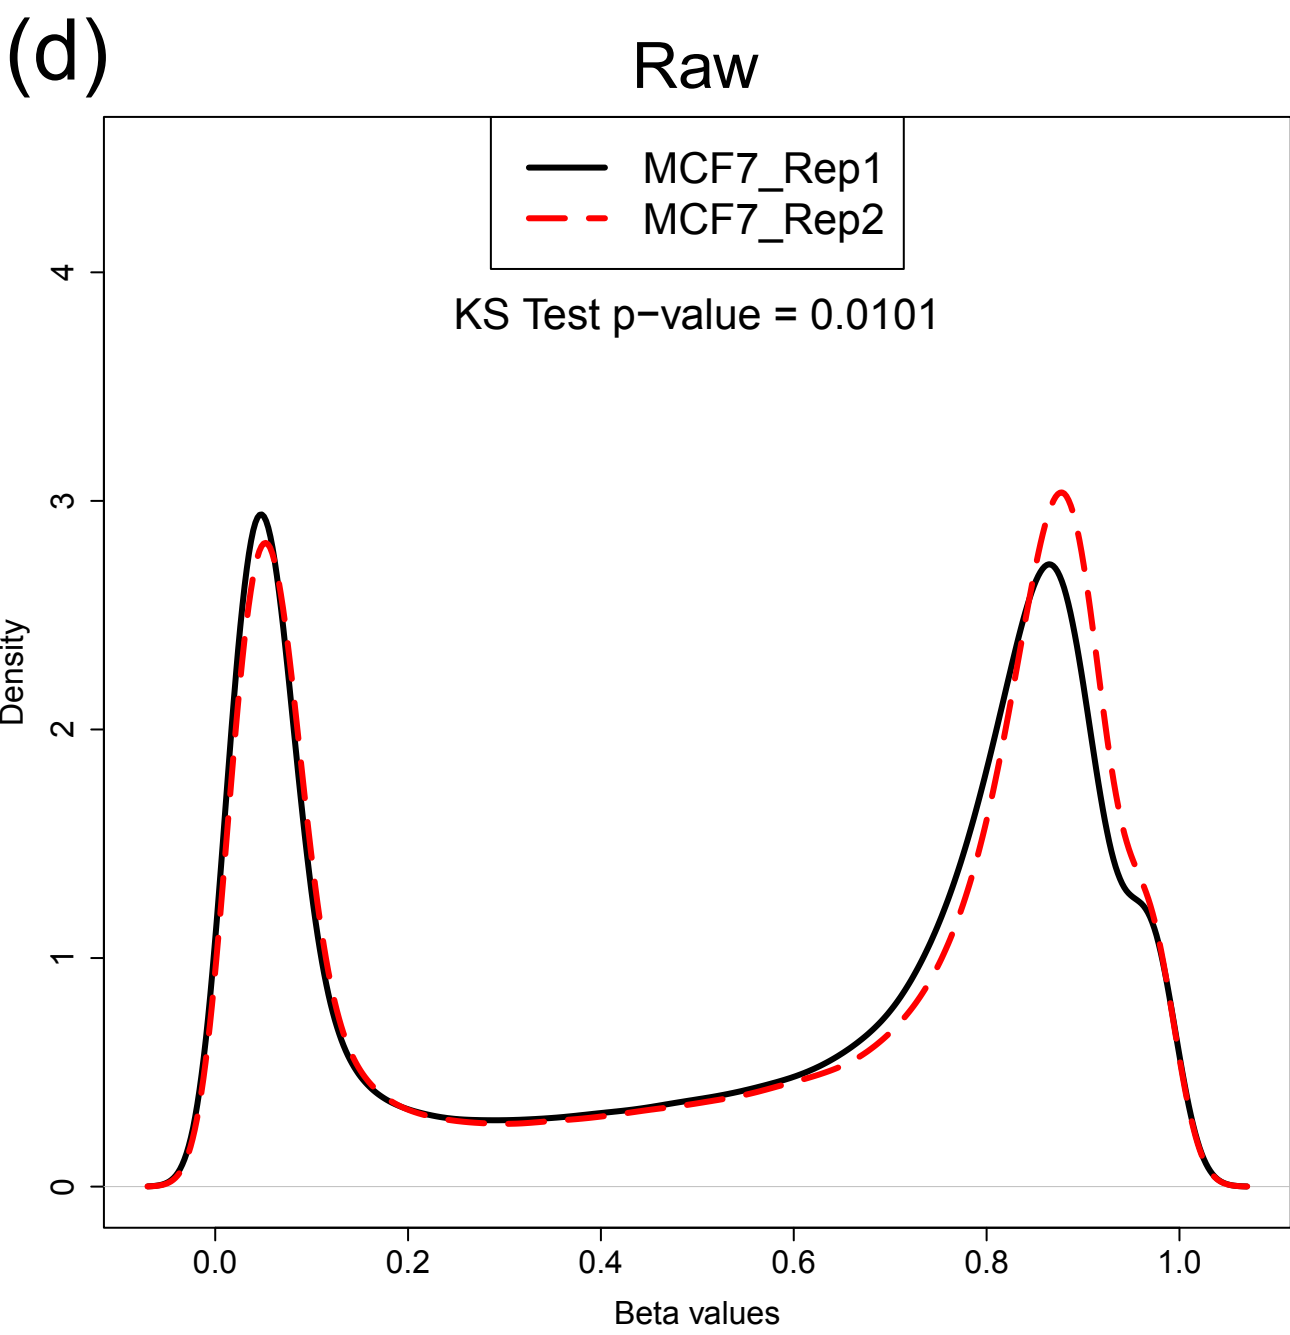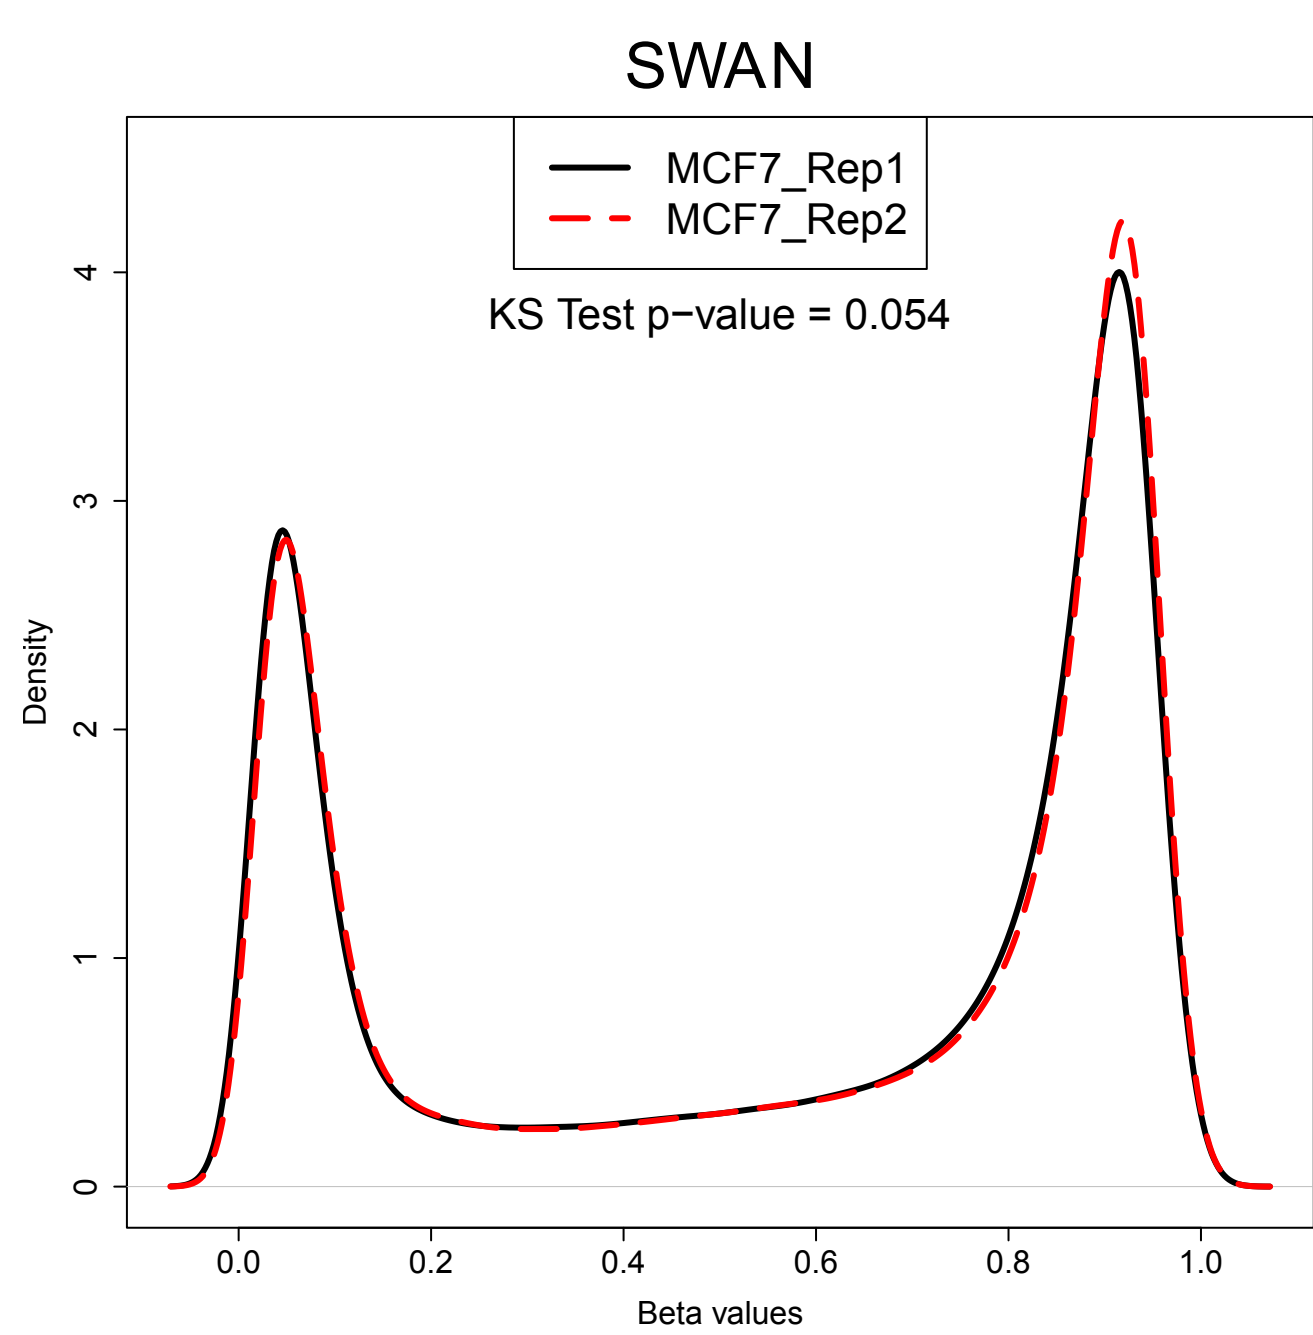

Supplement: 13059_2012_2883_MOESM7_ESM.pdf [file 13059_2012_2883_MOESM7_ESM.pdf]

# Raw

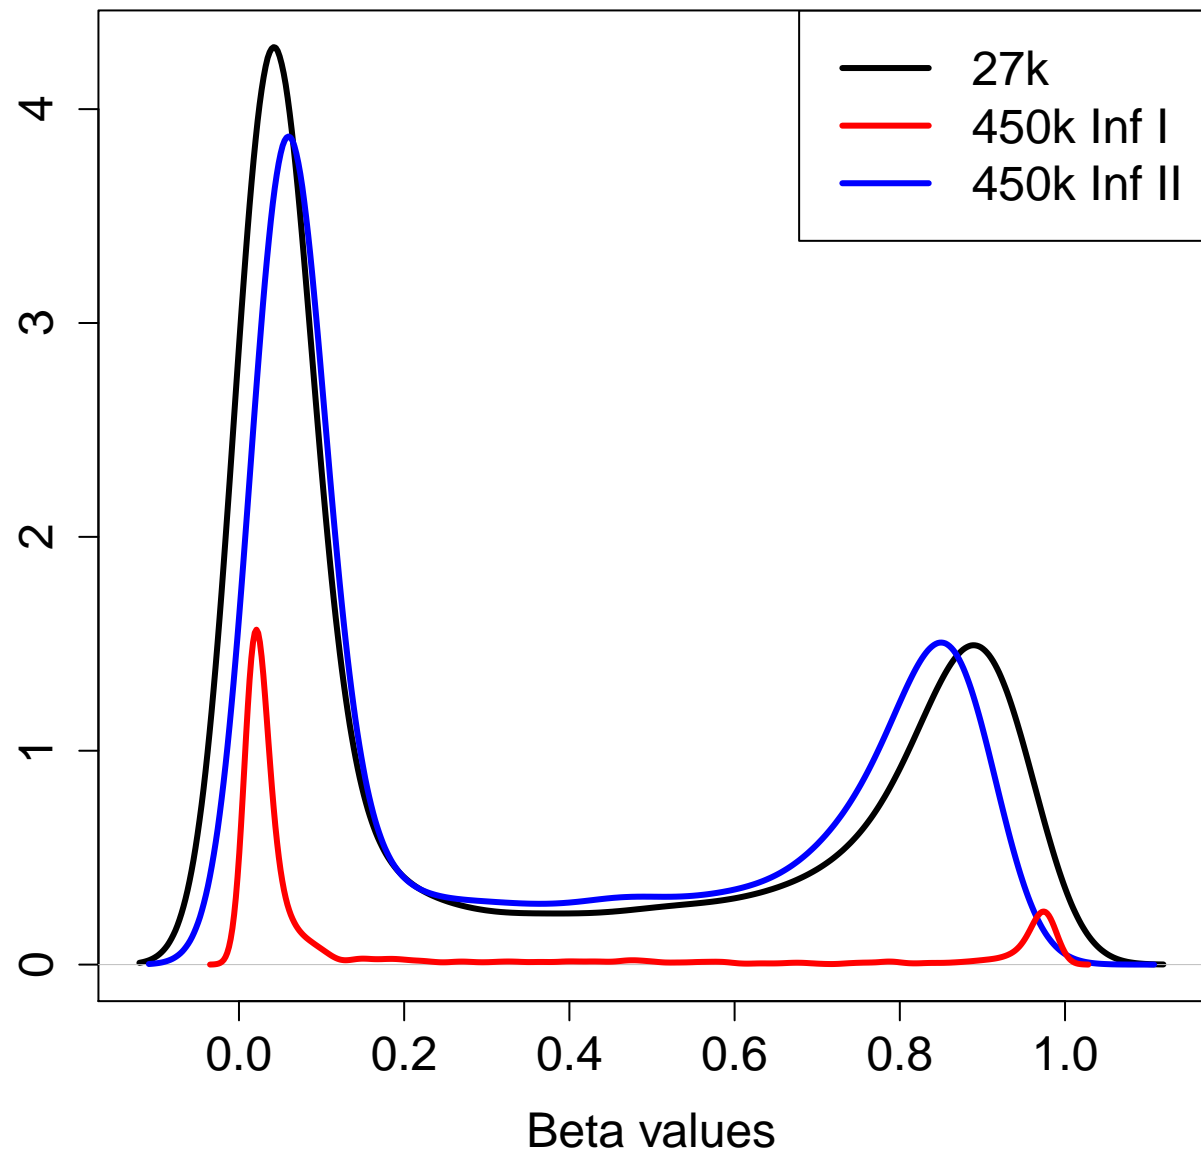

# SWAN

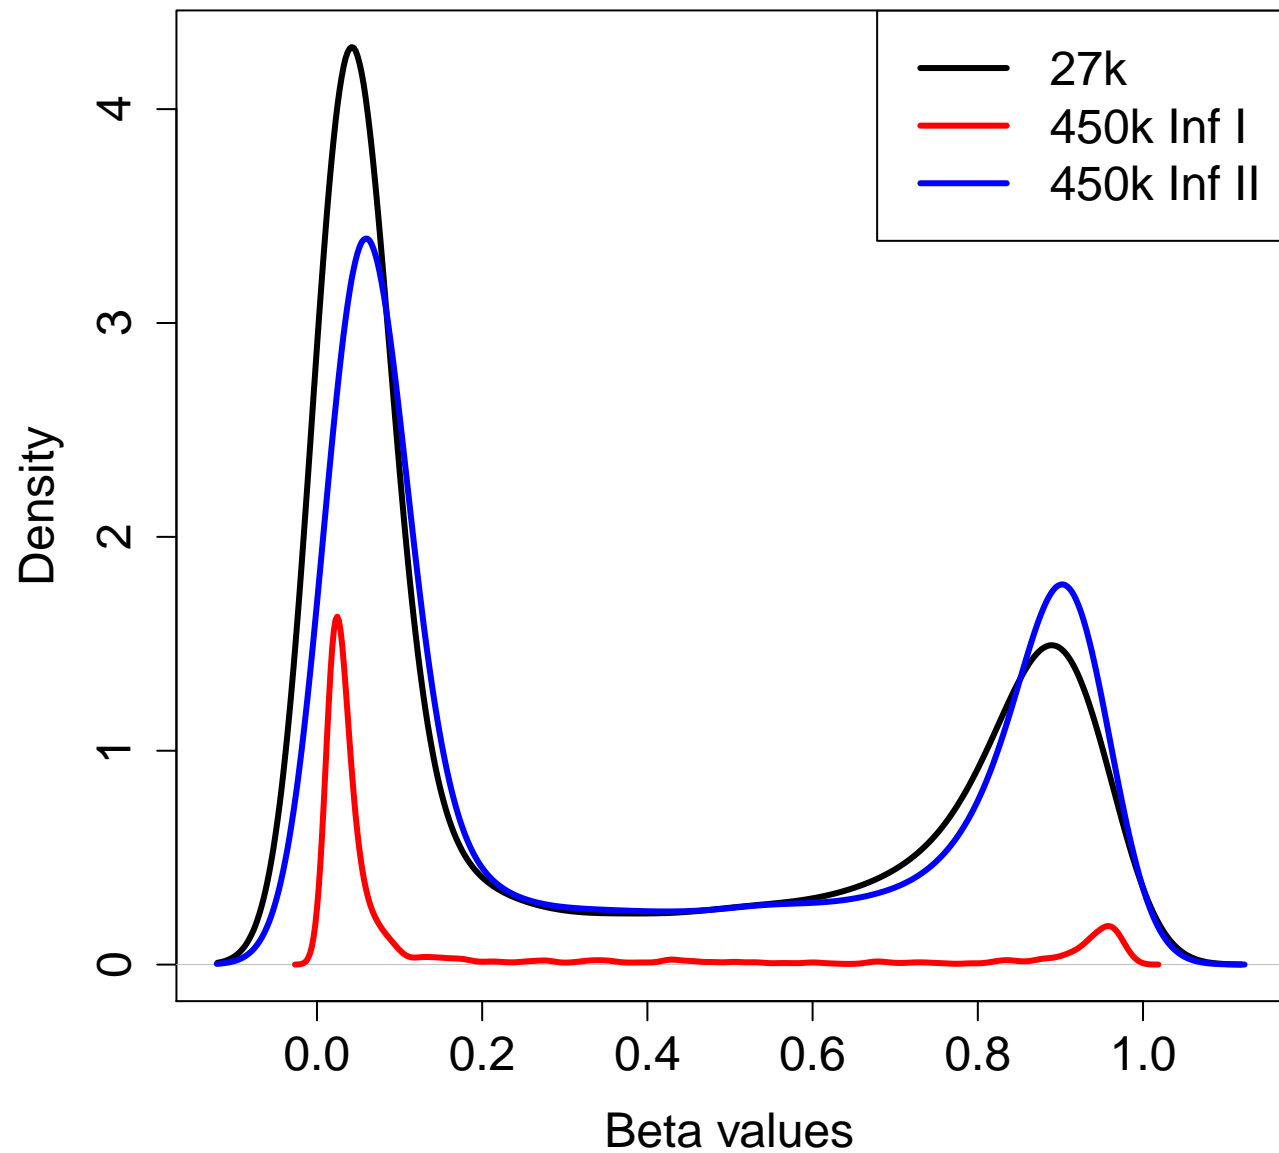

Supplement: 13059_2012_2883_MOESM8_ESM.pdf [file 13059_2012_2883_MOESM8_ESM.pdf]

(a)

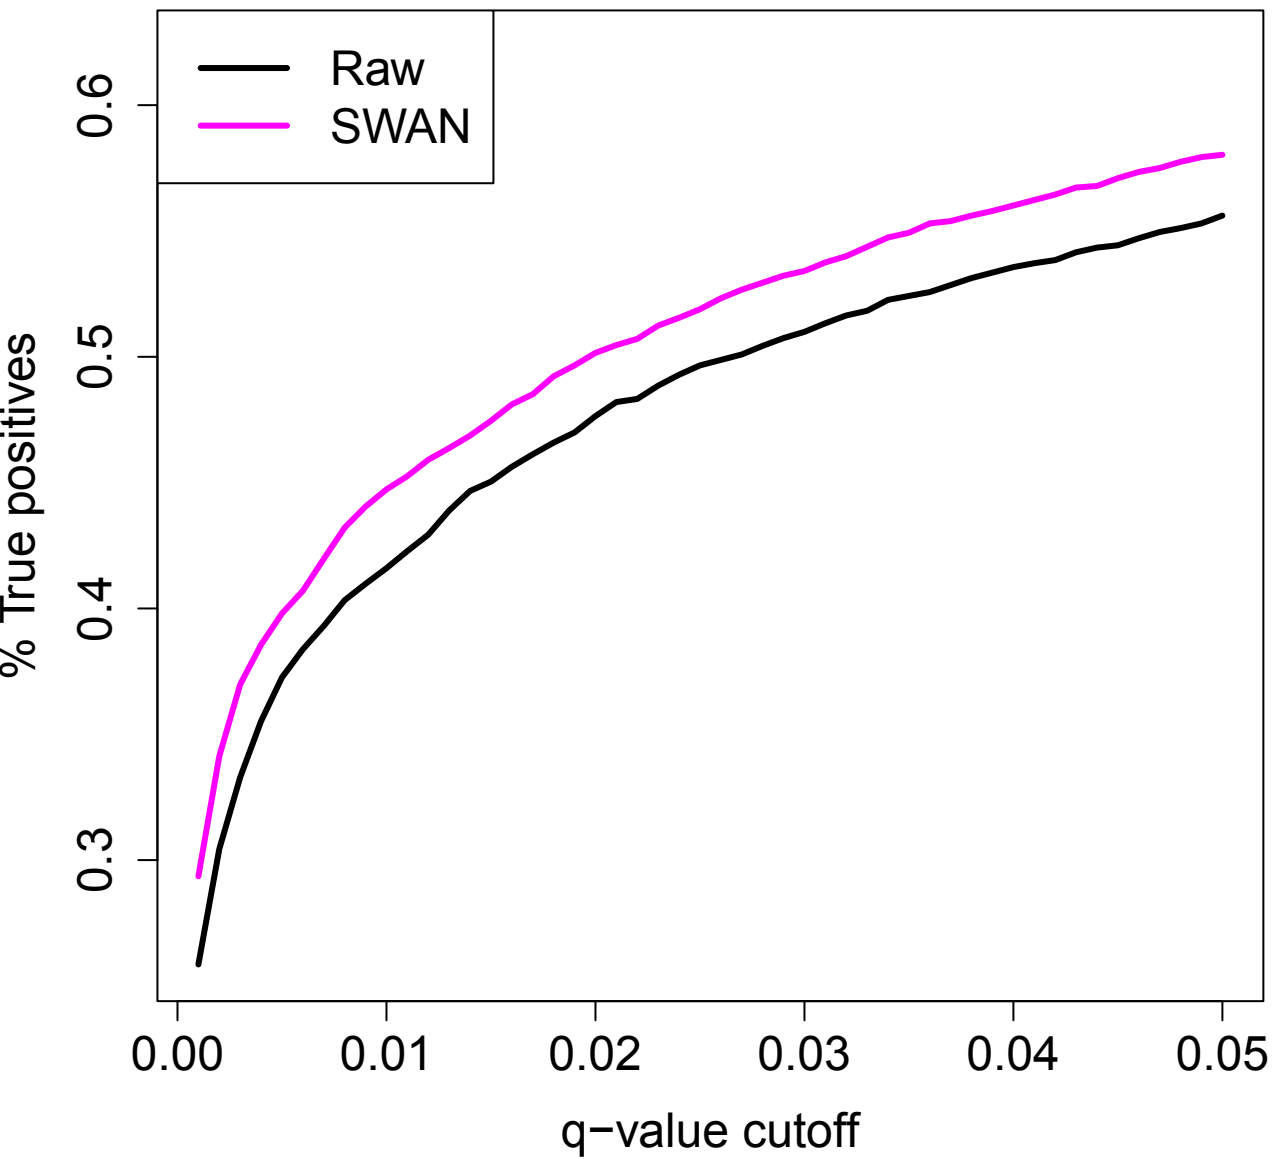

(b)

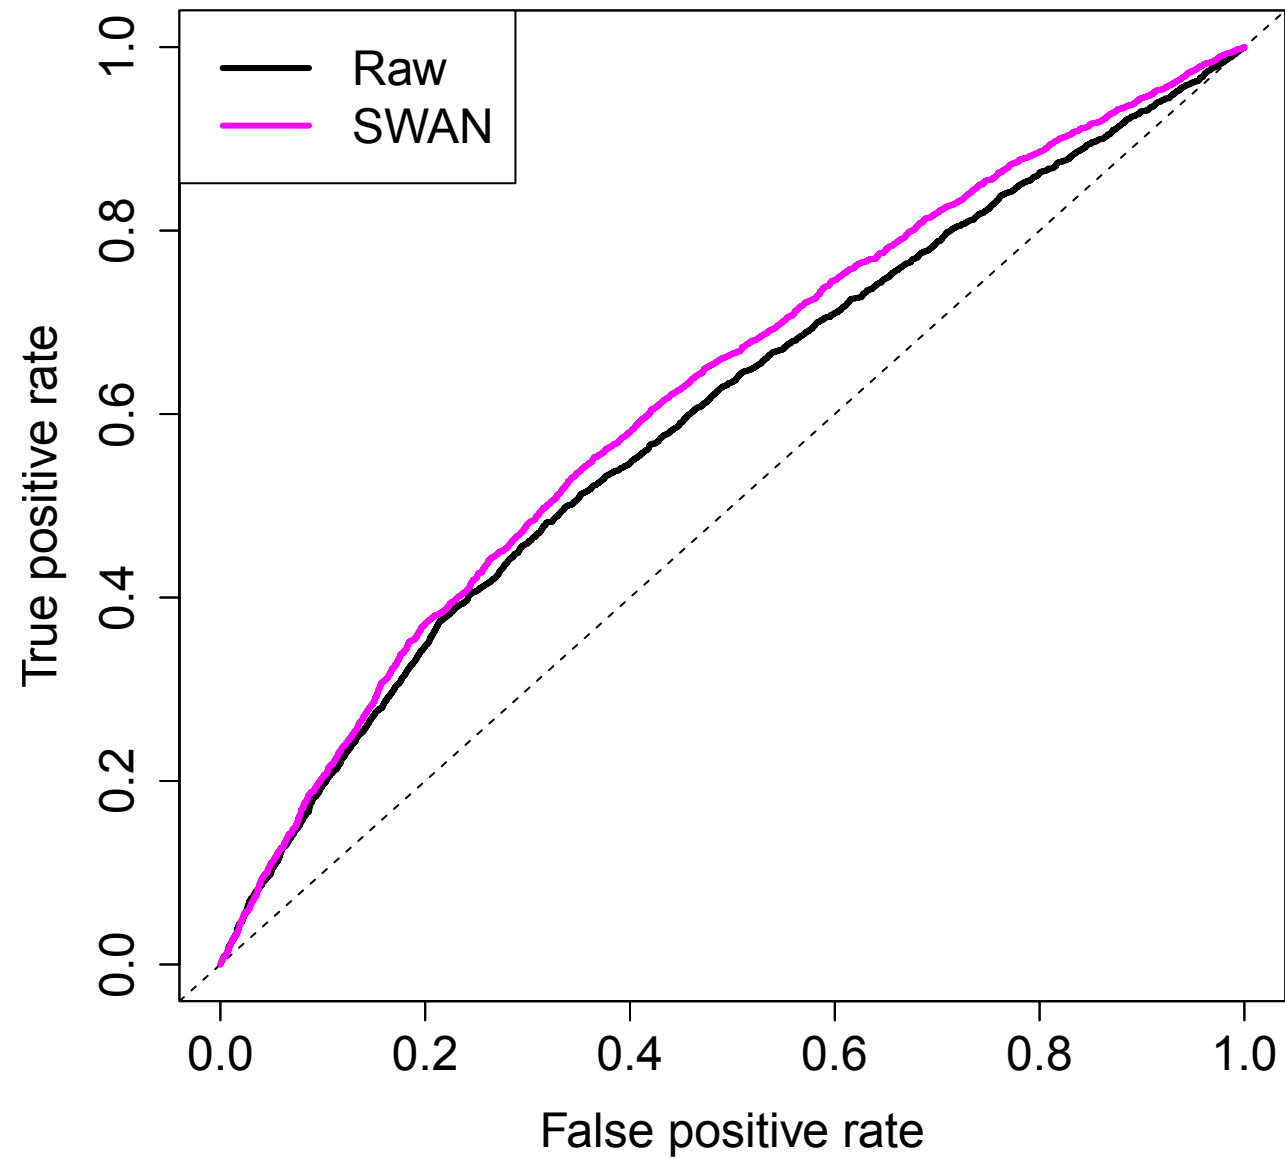

Supplement: 13059_2012_2883_MOESM9_ESM.pdf [file 13059_2012_2883_MOESM9_ESM.pdf]
